# Supplementary material for: Induced endometrial trauma (endometrial scratch) in the mid-luteal menstrual cycle phase preceding first cycle IVF/ICSI versus usual IVF/ICSI therapy: study protocol for a randomised controlled trial
Source: PubMed Central journal article supplement (PMC5961587; doi:10.1136/bmjopen-2017-020755), 2018-05-20
Supplement: bmjopen-2017-020755.draft_revisions.pdf [file bmjopen-2017-020755.draft_revisions.pdf]

# BMJ Open

BMJ Open is committed to open peer review. As part of this commitment we make the peer review history of every article we publish publicly available.

When an article is published we post the peer reviewers' comments and the authors' responses online. We also post the versions of the paper that were used during peer review. These are the versions that the peer review comments apply to.

The versions of the paper that follow are the versions that were submitted during the peer review process. They are not the versions of record or the final published versions. They should not be cited or distributed as the published version of this manuscript.

BMJ Open is an open access journal and the full, final, typeset and author-corrected version of record of the manuscript is available on our site with no access controls, subscription charges or pay-per-view fees (<http://bmjopen.bmj.com>).

If you have any questions on BMJ Open's open peer review process please email [info.bmjopen@bmj.com](mailto:info.bmjopen@bmj.com)

# BMJ Open

## Induced Endometrial Trauma (endometrial scratch) in the mid-luteal menstrual cycle phase preceding first cycle IVF/ICSI versus usual IVF/ICSI therapy: Study protocol for a randomised controlled trial

|                               |                                                                                                                                                                                                                                                                                                                                                                                                                                                                                                                                                                                                                                                                                                                                                                                                                                                                                                                                                             |
|-------------------------------|-------------------------------------------------------------------------------------------------------------------------------------------------------------------------------------------------------------------------------------------------------------------------------------------------------------------------------------------------------------------------------------------------------------------------------------------------------------------------------------------------------------------------------------------------------------------------------------------------------------------------------------------------------------------------------------------------------------------------------------------------------------------------------------------------------------------------------------------------------------------------------------------------------------------------------------------------------------|
| Journal:                      | <i>BMJ Open</i>                                                                                                                                                                                                                                                                                                                                                                                                                                                                                                                                                                                                                                                                                                                                                                                                                                                                                                                                             |
| Manuscript ID                 | bmjopen-2017-020755                                                                                                                                                                                                                                                                                                                                                                                                                                                                                                                                                                                                                                                                                                                                                                                                                                                                                                                                         |
| Article Type:                 | Protocol                                                                                                                                                                                                                                                                                                                                                                                                                                                                                                                                                                                                                                                                                                                                                                                                                                                                                                                                                    |
| Date Submitted by the Author: | 28-Nov-2017                                                                                                                                                                                                                                                                                                                                                                                                                                                                                                                                                                                                                                                                                                                                                                                                                                                                                                                                                 |
| Complete List of Authors:     | <p>Pye, Clare; Sheffield Teaching Hospitals NHS Foundation Trust, Obstetrics, Gynaecology &amp; Neonatology<br/>           Chatters, Robin; University of Sheffield, Health and Related Research<br/>           Cohen, Judith; The University of Sheffield, School of Health and Related Research (SchARR)<br/>           Brian, Kate; Fertility UK<br/>           Cheong, Ying; University of Southampton, Obstetrics and Gynaecology<br/>           Laird, Susan; Sheffield Hallam University<br/>           Mohiyiddeen, Lamiya; Central Manchester University Hospitals NHS Foundation Trust, Department Of Reproductive Medicine<br/>           Skull, Jonathan; Jessop Wing Hospital<br/>           Walters, Stephen; University of Sheffield, SchARR<br/>           Young, T; The University of Sheffield, SchARR<br/>           Metwally, Mostafa; Sheffield Teaching Hospitals NHS Foundation Trust, Obstetrics, Gynaecology &amp; Neonatology</p> |
| Keywords:                     | Endometrial Trauma, Endometrial Scratch, IVF, Assisted Conception                                                                                                                                                                                                                                                                                                                                                                                                                                                                                                                                                                                                                                                                                                                                                                                                                                                                                           |
|                               |                                                                                                                                                                                                                                                                                                                                                                                                                                                                                                                                                                                                                                                                                                                                                                                                                                                                                                                                                             |

SCHOLARONE™  
Manuscripts

**Title**

Induced Endometrial Trauma (endometrial scratch) in the mid-luteal menstrual cycle phase preceding first cycle IVF/ICSI versus usual IVF/ICSI therapy: study protocol for a randomised controlled trial.

**Author (and corresponding author):**

Clare Pye- RN

Lead Research Nurse/Clinical Trial Co-ordinator – Endometrial Scratch Trial

Rm 32, level 4. Jessop Wing

Sheffield Teaching hospitals NHS Foundation Trust

Tree Root Walk,

Sheffield. S10 2SF

Tel: 0114 2268194

E-mail: clare.pye@sth.nhs.uk

**Co-Authors**

Robin Chatters- Project Manager

University of Sheffield- Clinical Trials Research Unit

Sheffield-UK

Dr Judith Cohen - Research Fellow/ Assistant Director CTRU - Design, Trials and Statistics (DTS). Research Fellow - The NIHR Research Design Service for Yorkshire & the Humber.

School of Health and Related Research (SchARR)

University of Sheffield

Sheffield. UK

Ms Kate Brian - Patient & Public Involvement (PPI)

Fertility Network UK

London. – UK

Professor Ying Cheong - Professor of Reproductive Medicine, Honorary Consultant in Reproductive Medicine and Surgery.

Complete Fertility Centre Southampton

University Hospital Southampton NHS Foundation Trust.

Southampton. UK

Dr Susan Laird – Head of the Department of Biosciences and Chemistry

Biomedical Research Centre

Sheffield Hallam University

Sheffield. UK

Endometrial Scratch protocol paper for the BMJ open. Version 1 dated 28/11/2017

For peer review only - <http://bmjopen.bmj.com/site/about/guidelines.xhtml>

1  
2  
3 Dr Lamiya Mohiyiddeen - Consultant Gynaecologist  
4 Consultant Gynaecologist  
5 Saint Mary's Hospital - Central Manchester University Hospitals  
6 Manchester. UK  
7

8  
9 Mr Jonathan Skull – Consultant in Reproductive Medicine  
10 Fertility Unit - Jessop Wing  
11 Sheffield Teaching Hospitals NHS Foundation Trust  
12 Sheffield. UK  
13  
14

15  
16 Professor Stephen Walters - Trial Statistician  
17 School of Health and Related Research and  
18 NIHR Research Design Service Yorkshire and the Humber  
19 University of Sheffield  
20 Sheffield. UK  
21  
22

23  
24 Dr Tracey Young - Senior Researcher in Health Economics  
25 Senior Researcher in Health Economics  
26 Health Economics & Design Science  
27 (ScHARR)  
28 University of Sheffield  
29 Sheffield. UK  
30  
31

32  
33 Mr Mostafa Metwally MD FRCOG - Consultant Gynaecologist and Subspecialist in  
34 Reproductive Medicine and Surgery  
35 Fertility Unit - Jessop Wing  
36 Sheffield Teaching Hospitals NHS Foundation Trust  
37 Sheffield. UK  
38  
39

40  
41  
42 **Key words:**  
43

44 Endometrial Scratch  
45

46 In Vitro Fertilisation  
47

48 Endometrial Trauma  
49

50 Assisted Conception  
51

52 Randomised Controlled Trial  
53  
54  
55  
56  
57

58 Endometrial Scratch protocol paper for the BMJ open. Version 1 dated 28/11/2017

59 For peer review only - <http://bmjopen.bmj.com/site/about/guidelines.xhtml>  
60

## Abstract

### Introduction

Endometrial Trauma commonly known as Endometrial Scratch (ES) has been shown to improve pregnancy rates in women with a history of repeated implantation failure undergoing In Vitro Fertilisation (IVF), with or without Intracytoplasmic Sperm Injection (ICSI). However, the procedure has not yet been fully explored in women having IVF/ICSI for the first time. This study aims to examine the effect of performing an ES in the midluteal phase prior to a first time IVF/ICSI cycle on the chances of achieving a clinical pregnancy and live birth. If ES can influence this success rate there would be a significant cost saving to the NHS through decreasing the number of IVF/ICSI cycles necessary to achieve a pregnancy, increase the practice of single embryo transfer (SET) and consequently have a large impact on risks and costs associated with multiple pregnancies.

### Methods & Analysis

This 30 month, UK, multi-centre, parallel group, randomised controlled trial includes a 9 month internal pilot and health economic analysis recruiting 1044 women from 16 UK Fertility Units. It will follow up participants to identify if IVF/ICSI has been successful and live birth has occurred up to 6 weeks post-partum. Primary analysis will be on an intention to treat basis. A sub-study of endometrial samples obtained during the ES will assess the role of immune factors in embryo implantation.

Participants randomised to the intervention group will receive the ES procedure in the mid luteal phase prior to first time IVF/ICSI treatment versus usual IVF/ICSI treatment in the control group, with 1:1 randomisation. The primary outcome is live birth rate (LBR) after completed 24 weeks gestation.

### Ethics and dissemination

The South Central – Berkshire NREC has approved the trial protocol. The findings will be submitted to peer- reviewed journals and abstracts will be submitted to relevant national and international conferences.

Trial Registration number: ISRCTN: 23800982

### Strengths and limitations of this study

- This will be the largest randomised controlled trial to date assessing the effectiveness and cost effectiveness of performing the ES procedure in women having IVF/ICSI for the first time
- The trial will have the potential to inform the practice of offering this 'add-on treatment' as well as the practice of single embryo transfer.
- It will determine whether performing an ES is an acceptable and well tolerated procedure.
- Due to the nature of the intervention it is not possible to blind study participants.

Endometrial Scratch protocol paper for the BMJ open. Version 1 dated 28/11/2017

For peer review only - <http://bmjopen.bmj.com/site/about/guidelines.xhtml>

- Potential difficulty with recruitment if patients are not in equipoise about effectiveness of the ES procedure in first time IVF/ICSI cycles.

## Background

The use of local endometrial trauma known as Endometrial Scratch (ES) to improve implantation rates in women undergoing assisted conception was first described in 2003 [1]. The procedure has since been explored in several studies mainly focusing on women with recurrent implantation failure and has been shown to significantly increase pregnancy rates by almost double [2–4]. Three recent systematic reviews have summarised the evidence, however each included different studies. A recent Cochrane review included fourteen randomised studies; seven in women with previous cycle failure, five in an unselected population and one in a first-time cycle [5]. The live birth rate meta-analysis combined trials regardless of the population (i.e. number of previous IVF cycles) and included five studies, reporting a risk ratio (RR) of 1.42 (1.08, 1.85),  $p=0.02$  [6,7]. The odds of achieving a clinical pregnancy were also increased following ES with a RR of 1.34 (1.11, 1.62),  $p=0.002$ . The one trial conducted in women undergoing their first IVF cycle indicated the procedure was harmful with an OR of clinical pregnancy rate of 0.30 (0.14, 0.63)  $p=0.002$  [8]. Notably, this trial performed the ES procedure at the time of oocyte retrieval and not in the month prior to the IVF cycle. Despite the concerns around the quality of evidence in using ES and that the trials undertaken so far have been small (most <150 participants), ES has been widely adopted into routine clinical practice in women with recurrent unsuccessful implantation and is currently being provided in some fertility units where women are having IVF/ICSI for the first time [9,10]. Therefore, it is essential that a large well controlled multi-centre trial is conducted to fully investigate the effectiveness and safety of this technique in women undergoing their first cycle of IVF/ICSI.

The Human Fertilisation and Embryology Authority (HFEA) state in their statistical report into multiple births that the risks associated with multiple births is the single biggest health risk associated with fertility treatment [11]. Multiple births carry risks to the health of both the mother and the babies and that birth of a healthy singleton child, born at full term, is therefore the safest outcome of fertility treatment for both mother and child and is best achieved through promoting the practice of single embryo transfer (SET).

If ES can improve the implantation potential of the embryo and therefore improve success rates, ES may encourage an expansion of current SET policies. Inclusion of women with a lower chance of having cryopreserved embryos and a more general increase in the implementation of the practice of SET, could consequently have a large impact on the risks and costs associated with multiple pregnancies as a result of IVF [12].

The exact mechanism by which ES may improve implantation is not yet known, however it is known that implantation is a complex process involving a number of inflammatory mediators including uterine natural killer cells, leukaemia inhibitory factor and interleukin 15 [13]. It is possible that ES may lead to the activation of inflammatory cells such as

1  
2  
3 macrophages and dendritic cells, and release of inflammatory mediators such as tumour  
4 necrosis factor- $\alpha$ , interleukin-15, growth-regulated oncogene- $\alpha$  and macrophage  
5 inflammatory protein 1B [14].  
6

7 ES has also been shown to cause the modulation of several endometrial genes that may be  
8 involved in membrane stability during the process of implantation such as bladder  
9 transmembranal protein (UPIb) and adipose differentiation-related protein and mucin 1  
10 [15].  
11  
12

13 ES is routinely performed as an outpatient procedure. Risks have been identified in a  
14 previous study when the procedure was undertaken on the day of oocyte retrieval;  
15 however, the procedure is not known to be associated with any particular risks when  
16 undertaken in the menstrual cycle preceding that of IVF therapy, apart from period like  
17 discomfort whilst performing the procedure [8]. Taking simple analgesics prior to the  
18 procedure usually alleviates this. As with any intrauterine procedure there is a potential for  
19 intrauterine infection. However women attending for fertility treatment are usually  
20 screened for serious vaginal infections such as chlamydia to minimise the risk of any spread  
21 of infection when performing the embryo transfer procedure, a similar procedure to an ES  
22 as it involves the insertion of a catheter into the uterine cavity.  
23  
24  
25  
26

27 The main objectives of this trial are to assess the clinical and cost effectiveness of the ES  
28 procedure in women aged between 18 and 37 years (inclusive) undergoing their first  
29 IVF/ICSI cycle using either antagonist or long protocols to see if it could potentially improve  
30 implantation rates and hence encourage the practice of single embryo replacement. A sub-  
31 study will be undertaken in two of these centres (Sheffield and Southampton) where  
32 endometrial samples obtained from the ES procedure will be stored for later analysis to  
33 identify endometrial factors associated with successful pregnancy outcome.  
34  
35  
36

### 37 **Method and Analysis**

38 The Endometrial Scratch Trial is a multi-centre, parallel group, randomised controlled trial to  
39 examine the clinical, cost effectiveness and safety of an ES performed in the mid-luteal  
40 phase prior to a first time IVF/ICSI cycle. Eligible participants will be randomised to either  
41 the treatment as usual (TAU) arm, consisting of usual IVF treatment, or the intervention arm  
42 where ES will be performed followed by usual IVF treatment. The overall study design is  
43 illustrated below in the study flow chart (figure 1).  
44  
45  
46  
47  
48  
49  
50  
51  
52  
53  
54  
55  
56  
57

Figure 1. Study flow chart.

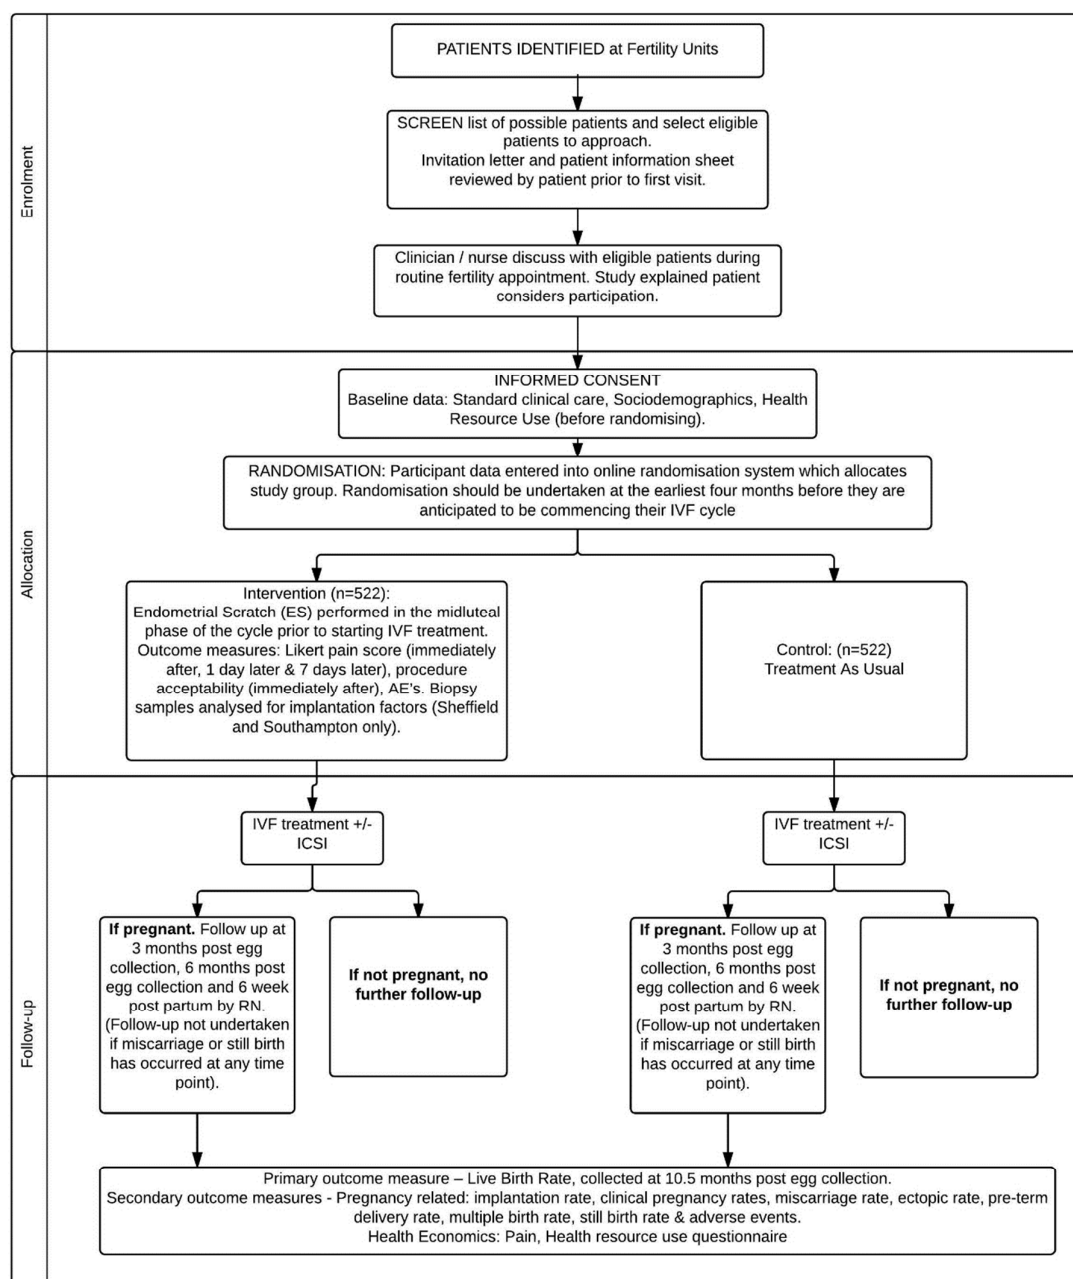

The trial consists of two phases - an internal pilot to assess feasibility of recruitment and delivery of the intervention, and a two year main recruitment phase.

The trial will commence with a 9 month internal pilot recruitment phase across approximately 6 sites to justify whether or not the recruitment strategy and the scheduling of the endometrial scratch procedure are feasible and will use the same trial procedures as described for the main trial.

Endometrial Scratch protocol paper for the BMJ open. Version 1 dated 28/11/2017

For peer review only - <http://bmjopen.bmj.com/site/about/guidelines.xhtml>



1  
2  
3 The trial is collaboration between research staff at The Jessop Wing, Sheffield Teaching  
4 Hospital NHS Foundation Trust & the University of Sheffield - Clinical Trials Research Unit  
5 (CTRU) who are responsible for the conduct of the trial. Funding to run the trial has been  
6 awarded by the National Institute of Healthy Research (NIHR) Health Technology  
7 Assessment (HTA). At the end of the pilot phase, the Trial Steering Committee (TSC) will  
8 report to the funder on whether the feasibility criteria have been met and whether the trial  
9 should continue.  
10

11  
12 The trial will be conducted in compliance with the protocol, GCP and regulatory  
13 requirements.  
14  
15

16 Sheffield CTRU will aggregate feasibility of the research and intervention protocols based on  
17 the following outcomes.

18 The trial will be considered infeasible and will be stopped if either of the following  
19 conditions apply:  
20

21  
22 1. Feasibility of recruitment to the main trial: defined as recruitment of fewer than 108  
23 participants (75% of the 144 target) during the internal pilot phase.  
24

25  
26 2. Scheduling of the ES procedure: defined as less than 75% of women scheduled to receive  
27 their ES procedure have received the ES at the correct time point.  
28

### 29 **Recruitment**

30 Upon successful completion of the pilot the main trial will aim to recruit women attending  
31 16 UK Fertility Units for first time IVF treatment. Participation is entirely voluntary and  
32 choosing not to participate will not negatively influence the woman's treatment in any way.  
33 Furthermore consent can be withdrawn at any stage. Women who are about to undergo  
34 their first cycle of IVF/ICSI will be identified by screening patients referred for these  
35 treatments. Eligible women will be sent information regarding the trial in the post or via  
36 e-mail or may be alerted to the trial via the trial website or posters displayed at the fertility  
37 unit. If they are interested in participating they will be invited to discuss the trial with their  
38 fertility team at their next routine appointment.  
39  
40  
41  
42

43 Prior to randomisation full written informed consent will be obtained by a suitably trained  
44 Doctor or Research Nurse/Midwife at a clinic visit. The participant will complete a study  
45 specific resource use questionnaire prior to randomisation to collect health care usage in  
46 the previous 3 months; baseline data will be collected at this visit and participants will be  
47 randomly allocated to either the intervention or usual care arm of the trial.  
48  
49

50 Detailed methods of the Endometrial Scratch trial are described in the Endometrial Scratch  
51 protocol available on the website – <https://www.sheffield.ac.uk/scratchtrial>  
52  
53  
54  
55  
56  
57

1  
2  
3 Women will be included and considered suitable if they meet the following eligibility  
4 criteria:

5  
6 Inclusion criteria

- 7  
8  
9  
10  
11  
12  
13  
14  
15  
16  
17  
18  
19  
20  
21  
22  
23  
24  
25  
26  
27  
28  
29  
30  
31  
32
- aged between 18 and 37 years (inclusive) at the time of egg collection and having IVF/ICSI for the 1st time using the antagonist or long protocol only
  - expected to receive treatment using fresh embryos and considered to be good responders to treatment ( Regular ovulatory menstrual cycle, Normal uterine cavity, expected good ovarian reserve) and where single embryo transfer is expected at the point of entry into the trial.
  - no relevant vaginal/uterine infections and are willing to use an appropriate method of barrier contraception (if randomised to Endometrial Scratch in the cycle where the ES procedure is performed), understands and are willing to comply with the trial protocol.

33  
34  
35  
36  
37  
38  
39  
40  
41  
42  
43  
44  
45  
46  
47  
48  
49  
50  
51  
52  
53  
54  
55  
56  
57

Exclusion criteria

- previous trauma/surgery to the endometrium and have a BMI of 35 kg/m<sup>2</sup> or greater with known grade 4 (severe) endometriosis, are currently participating in any other fertility study involving medical/surgical intervention.
- expected to receive ultra-long protocol, have previously received or have planned an endometrial scratch (or similar procedure, e.g. endometrial biopsy for the collection of Natural Killer Cells) or previously randomised into this trial.

58  
59  
60

**Sampling**

The primary outcome is the live birth rate (LBR). This is defined as a live birth after completed 24 weeks gestation, within the 10.5 month post egg collection follow-up period. This time-period will enable the collection of any neonatal deaths (up to 6 weeks post-partum). The denominator for calculating the LBR will be the number of women randomised to each group. Data from the HFEA suggests a live birth rate of 32.8% in women under 35 and 27.3 % in women aged 35-37. The sample size calculation assumes a 30% LBR in the control group and that an absolute increase of 10%, to a 40% LBR (a relative risk of 1.33) in the intervention groups is of clinical and practical importance. The effect size, a 10% absolute difference in LBR, we are proposing is large but we believe an effect of such magnitude is needed to change clinical practice (there is a 5% absolute difference in LBR between women aged under 35 and 35-37) and is less than that observed in the systematic reviews described above (where, at the time of sample size calculation, the relative risk estimates for live birth ranged from 1.83 to 2.46) [2,16]. To have a 90% power of detecting this difference or more, in LBR rates between the groups, as statistically significant at the 5% two-sided level, will require 496 women per group (992 in total). Adjusting for a predicted drop-out rate of 5% (due to anticipated difficulties of follow-up for patients who have been

referred from NHS Trusts other than the participating Fertility Unit) we will require 1044 participants.

### **Study procedures**

Following randomisation women in the intervention arm will have the ES procedure performed in the midluteal phase of their cycle prior to their planned IVF/ICSI cycle in the outpatient setting of the fertility unit. The choice of screening for infection prior to the procedure or the administration of antibiotics will be left to individual units according to their local established protocols and procedures. Women can be randomised any time up until they start their IVF cycle, although it may be necessary for the participant to delay her IVF if randomised to the intervention arm. This decision to delay should be made and agreed by both the patient and her fertility team before randomisation is undertaken. Women randomised to TAU will continue with their IVF/ICSI as planned and will not receive the ES procedure.

Following delivery of the ES, participants will undergo IVF/ICSI in line with local procedures. Following successful embryo transfer (in both groups) a pregnancy test will be performed and adverse events will be collected. In cases where women do not undergo embryo transfer, every effort will be made by the research team to collect any adverse event information from either the patient or the medical notes. If a pregnancy is confirmed the woman is discharged to normal antenatal care as per standard practice.

### **Randomisation**

The randomisation schedule will be generated by Sheffield CTRU prior to the start of the trial and the randomisation sequence computer generated and stratified by site and protocol (antagonist or long protocol). Random permuted blocks of variable size will be used to ensure enough participants are allocated evenly to each arm of the trial at each site.

### **Trial Intervention**

ES is a minor procedure of 10 to 20 minute duration that will be performed in an outpatient setting at local IVF centres in line with local procedures and the trial standard operation procedure (SOP). The participant will be required to use a barrier method of contraception (if necessary) during the menstrual cycle in which the ES will be performed. During ES, a speculum is inserted into the vagina and the cervix exposed and cleaned. A pipelle or similar endometrial sampler is then inserted into the cavity of the uterus; negative pressure is applied by withdrawal of the plunger. The sampler is rotated and withdrawn several times so that tissue appears in the transparent tube. The sampler and speculum are then removed. If no tissue is seen in the transparent sampler, this is an indication that the sampler was not fully inside the uterine cavity and therefore the procedure is repeated. Following the procedure women will complete a visual pain scale (likert) to assess their pain and tolerability assessment of the procedure within 30 minutes of the initial ES and then again at 24 hours and 7 days post procedure via an automated text message.

1  
2  
3 Compliance to the intervention will be ascertained through the clinician or Research  
4 Nurse/Midwife recording whether or not the patients has a) attended the clinic for the ES  
5 procedure and b) received the ES procedure as per protocol. Any deviation from the  
6 protocol will be noted and reported as per the Sheffield CTRU SOP.  
7

### 8 9 **Follow-up**

10 Patient follow up will continue until the 1st cycle of IVF or the resulting pregnancy has  
11 concluded. If no pregnancy is confirmed the study is complete (regardless of which group  
12 the woman is randomised to). Pregnant women will be followed-up at 3 and 6 months post  
13 egg collection and then 6 weeks post-partum to collect pregnancy outcome data. If the  
14 pregnancy is ongoing at 3 months and 6 week post-partum, a health resource use  
15 questionnaire will be sent to the patient for completion. If a spontaneous pregnancy is  
16 achieved between randomisation and IVF treatment, the pregnancy will be followed up as  
17 described above, instead of egg collection, the date of the last menstrual period (LMP) will  
18 be used to schedule the 3 and 6- month follow ups.  
19  
20  
21  
22

### 23 **Safety considerations, safety monitoring and AE reporting**

24 All Adverse Events (AEs) and Serious Adverse Events (SAE) will be recorded by the local  
25 research team at each Fertility Unit. All AEs/SAEs will be followed up until satisfactory  
26 resolution or until the treating clinician and the principal investigator deems the event to be  
27 chronic or the participant to be stable. Research Nurses/Midwives will ask patients for any  
28 details of adverse events at five time-points: post procedure (if randomised to receive ES),  
29 at the participants' pregnancy test, and then, if pregnancy has been achieved, at 3 and 6  
30 months post egg collection and finally 6 weeks post-partum.  
31  
32  
33  
34

35 AEs/SAEs will be collected up to the participants' final study related follow-up event. If  
36 embryo transfer does not occur, the Research Nurse/Midwife will contact the participant  
37 approximately 2 weeks after egg collection to identify if any adverse events have occurred.  
38 In the case of a negative pregnancy test, the site research team should make every effort to  
39 obtain AE data from the patient or the medical notes at routine clinical care contacts; no  
40 further contact will be made outside of routine clinical care.  
41  
42  
43

44 Expected AEs will be those which occur regularly due to pregnancy, and expected SAEs are  
45 those events which are expected in the patient population as a result of the routine  
46 care/treatment of a patient. Expected SAEs and all AEs will be collected as part of the trial  
47 and entered into the eCRF, but will not be reported to regulatory bodies (NHS REC/sponsor).  
48 Unexpected SAEs will be reported to the Sheffield CTRU as soon as staff at the fertility unit  
49 becomes aware of the event.  
50  
51

52 All SAEs will be reviewed by the Data Monitoring & Ethics Committee (DMEC) and Trial  
53 Management Group (TMG) at regular intervals. The Chief Investigator (CI) will inform all  
54 Principal Investigators (PIs) concerned of relevant information that would adversely affect  
55 the safety of the participants.  
56  
57

58 Endometrial Scratch protocol paper for the BMJ open. Version 1 dated 28/11/2017  
59

## Outcomes

### Primary clinical outcome

- Live birth rate; based on the number of live births after 24 weeks gestation within the 10.5 month post egg collection follow-up period.

### Secondary outcomes

- Acceptability and pain rating of the Endometrial Scratch procedure, a visual pain scale (likert) to assess their pain and tolerability assessment of the procedure within 30minutes of the initial ES procedure, 1 day later and then again 7 days after the ES.
- Implantation rate
- Clinical pregnancy rate
- Miscarriage rate
- Ectopic pregnancy rate
- Multiple birth rate
- Preterm delivery rate
- Still birth rate
- Details of participant's IVF cycle (fertilisation, egg collection and embryo quality & transfer)
- Adverse events
- Health resource use of the participant & patient costs

The trial includes a health economic component to assess the cost of the intervention per extra live birth from an NHS and social care perspective. Resource use will include the intervention costs for ES, the cost of IVF treatment, visits to the assisted conception unit and for those who conceive antenatal and post-natal visits, delivery costs and any hospital stays not related to birth for both mother and baby. The resource use questionnaire will collect information on contacts with midwife and GP visits. A Patient Cost questionnaire will collect time taken to travel to appointments and loss of productivity. Unit costs will be derived from appropriate national sources and will include; NHS reference costs, Personal Social Service Research Unit costs and the **Office of National Statistics** [17–19]. The resource use questionnaire will be designed for this study and will draw on data collection tools developed in The School of Health and Related Research (SchARR) and those collated by the Database for Instruments for Resource Use Measurement (DIRUM).

### Blinding

Due to the nature of the intervention, it will not be possible to blind patients or clinicians to treatment allocation and since this trial evaluates objectively measured outcomes (pregnancy rates) that are unlikely to be affected by a placebo effect, it is not necessary to perform a sham procedure for the control group. The study statistician, TSC and health economist will be blinded to the allocation.

### **Trial monitoring and oversight committees**

The trial will be overseen by the TSC and the DMEC, membership of both will consist of independent experts in the field. The TSC will include a patient representative. Both committees will review recruitment, study progress and adverse events. The DMEC will receive monthly reports of recruitment and adverse events and, at their meetings, will also consider emerging evidence from other trials or research on ES. They may advise the chair of the TSC at any time if, in their view, the trial should be stopped for ethical reasons, including concerns about patient safety.

Day-to-day running of the trial will be coordinated by the Trial Management Group (TMG), consisting of the grant co-applicants, plus members of the Jessop Wing Fertility Unit, Sheffield CTRU and patient representatives.

### **Statistical analysis**

Primary analysis will be performed on the intention to treat population (all participants randomised into the trial). All statistical exploratory tests will be two-tailed at 5% nominal level. Baseline demographic (e.g. age), physical measurements (e.g. BMI), and health-related data will be described and summarised overall and for both treatment groups. The women, not the IVF cycle will be the unit of analysis. If the woman fails to get pregnant or does not have IVF treatment, they will be included in the analysis of the primary outcome as a negative outcome (i.e. non-live birth). For sensitivity analyses, per protocol (PP) analyses will also be undertaken which will be defined as for Endometrial Scratch participants in the intervention group, receiving the ES procedure as documented in the study protocol and undergoing IVF/ICSI in the subsequent menstrual cycle, including embryo transfer. For the control group, the PP population will receive IVF/ICSI including embryo transfer. Sub-group analyses will be undertaken to explore the effect of important variables related to the participant and their treatment on the primary and secondary outcomes. These subgroups are:

- Day of embryo transfer (day 2, 3, 4, 5 or 6),
- Fertilisation method (IVF, IVF or ICSI, ICSI [spilt]),
- Type of protocol (long or antagonistic),
- Embryo transfer (single or double) and whether the embryo was fresh or frozen
- Previous history of consecutive miscarriages (0-2 vs  $\geq 3$ )

AEs will be reported as a proportion of all women randomised. Adverse events including serious adverse events will be compared between the two groups using a Fisher's Exact test, Chi-squared test or negative binomial regression model in case of repeated events per woman (as appropriate). A 95% CI for the difference in adverse event rate between the

1  
2  
3 groups will also be calculated with associated point estimate depending on the method  
4 used.  
5

6 Health economic results will be presented in the net-benefit framework and will allow for  
7 uncertainty using bootstrapping and probabilistic sensitivity analysis.  
8

### 9 **Ethics and dissemination**

10 The study is registered on the ISRCTN database (reference 23800982) and has been  
11 approved by the South Berkshire Research Ethics Committee (reference 16/SC/0151). The  
12 findings of this trial will be submitted to peer- reviewed journals and abstracts to national  
13 and international conferences. Other stakeholder specific outputs in relevant formats will  
14 also be produced for commissioners, IVF practitioners, third sector and user advocacy  
15 organisations. A website will be established to promote the work of the trial. All knowledge  
16 transfer activity including translation will be informed by input from trial collaborators, the  
17 TSC and TMG to ensure the study is meeting the needs of the commissioners and audience.  
18  
19  
20  
21

### 22 **Discussion**

23 This trial will determine whether performing an ES procedure prior to 1st time IVF/ICSI  
24 treatment is an inexpensive, safe and well tolerated procedure that increases the live birth  
25 rate in women having SET. If shown to be the case, this will have a significant improvement  
26 in first cycle IVF success rates and potentially lead to significant cost savings to the NHS as  
27 fewer women would need to have repeat treatment cycles. This is particularly important in  
28 the current economic climate and with restrictions on funding and service provision. This  
29 will also have a significant impact for women, for whom the burden of repeated cycles is  
30 large.  
31  
32  
33  
34

### 35 **Acknowledgements**

36 We thank Dr Munya Dimairo - Research Fellow in Medical Statistics at the University of  
37 Sheffield for his contribution to the design/content of the protocol, The Jessop Wing  
38 Reproductive Health Public Advisory Panel as well as each local PI, Research Nurse/Midwife  
39 and research delivery team in the recruitment and management of patients.  
40  
41

### 42 **Authors Contributions**

43 Contributors: MM, CP, JC, KB, YC, SL, LM, JS, SW &, TY conceived the study, and contributed  
44 to study design, sample size calculations and analytical plans.  
45 MM, CP, RC, JC, KB, YC, SL, LM, JS, SW & TY initiated the project, have assisted in developing  
46 the protocol and helped with implementation.  
47 CP, RC, JC, & MM drafted the manuscript. All authors read and approved the final  
48 manuscript.  
49  
50  
51

### 52 **Competing interests**

53 None declared.  
54  
55  
56  
57

### Funding statement

This trial was funded by the NIHR Health Technology Assessment program grant number [14/08/45]

This article presents independent research supported by the National Institute for Health Research (NIHR). The views expressed are those of the author(s) and not necessarily those of the NHS, the NIHR or the Department of Health

### References

- 1 Barash A, Dekel N, Fieldust S, *et al*. Local injury to the endometrium doubles the incidence of successful pregnancies in patients undergoing in vitro fertilization. *Fertil Steril* 2003;**79**:1317–22. doi:10.1016/S0015-0282(03)00345-5
- 2 El-Toukhy T, Sunkara S, Khalaf Y. Local endometrial injury and IVF outcome: A systematic review and meta-analysis. *Reprod Biomed Online* 2012;**25**:345–54. doi:10.1016/j.rbmo.2012.06.012
- 3 Raziel A, Schachter M, Strassburger D, *et al*. Favorable influence of local injury to the endometrium in intracytoplasmic sperm injection patients with high-order implantation failure. *Fertil Steril* 2007;**87**:198–201. doi:10.1016/j.fertnstert.2006.05.062
- 4 Huang SY, Wang C-J, Soong Y-K, *et al*. Site-specific endometrial injury improves implantation and pregnancy in patients with repeated implantation failures. *Reprod Biol Endocrinol* 2011;**9**:140. doi:10.1186/1477-7827-9-140
- 5 Nastri CO, Lensen SF, Gibreel A, *et al*. Endometrial injury in women undergoing assisted reproductive techniques. In: Martins WP, ed. *Cochrane Database of Systematic Reviews*. Chichester, UK: : John Wiley & Sons, Ltd 2015. doi:10.1002/14651858.CD009517.pub3
- 6 Narvekar S a, Gupta N, Shetty N, *et al*. Does local endometrial injury in the nontransfer cycle improve the IVF-ET outcome in the subsequent cycle in patients with previous unsuccessful IVF? A randomized controlled pilot study. *J Hum Reprod Sci* 2010;**3**:15–9. doi:10.4103/0974-1208.63116
- 7 The effect of local injury to the endometrium for implantation and pregnancy rates in ICSI -ET cycles with recurrent implantation failure: a randomised controlled study. 2011.clinicaltrials.gov/NCT01340560
- 8 Karimzade MA, Oskouian H, Ahmadi S, *et al*. Local injury to the endometrium on the day of oocyte retrieval has a negative impact on implantation in assisted reproductive cycles: A randomized controlled trial. *Arch Gynecol Obstet* 2010;**281**:499–503. doi:10.1007/s00404-009-1166-1
- 9 Spencer EA, Mahtani KR, Goldacre B, *et al*. Claims for fertility interventions: a systematic assessment of statements on UK fertility centre websites. *BMJ Open* 2016;**6**:e013940. doi:10.1136/bmjopen-2016-013940

Endometrial Scratch protocol paper for the BMJ open. Version 1 dated 28/11/2017

For peer review only - <http://bmjopen.bmj.com/site/about/guidelines.xhtml>



- 1  
2  
3 10 Lensen S, Sadler L, Farquhar C. Endometrial scratching for subfertility: Everyone's  
4 doing it. *Hum Reprod* 2016;**31**:1241–4. doi:10.1093/humrep/dew053  
5  
6 11 Human Fertilisation & Embryology Authority. Improving outcomes for fertility  
7 patients: Multiple births. A statistical report. 2011.  
8  
9 12 Ledger WL, Anumba D, Marlow N, *et al*. The costs to the NHS of multiple births after  
10 IVF treatment in the UK. *BJOG* 2006;**113**:21–5. doi:10.1111/j.1471-0528.2005.00790.x  
11  
12 13 Tuckerman E, Mariee N, Prakash A, *et al*. Uterine natural killer cells in peri-  
13 implantation endometrium from women with repeated implantation failure after IVF.  
14 *J Reprod Immunol* 2010;**87**:60–6. doi:10.1016/j.jri.2010.07.001  
15  
16 14 Gnainsky Y, Granot I, Aldo PB, *et al*. Local injury of the endometrium induces an  
17 inflammatory response that promotes successful implantation. *Fertil Steril*  
18 2010;**94**:2030–6. doi:10.1016/j.fertnstert.2010.02.022  
19  
20 15 Kalma Y, Granot I, Gnainsky Y, *et al*. Endometrial biopsy-induced gene modulation:  
21 first evidence for the expression of bladder-transmembranal uroplakin Ib in human  
22 endometrium. *Fertil Steril* 2009;**91**:1042–9, 1049-9.  
23 doi:10.1016/j.fertnstert.2008.01.043  
24  
25 16 Nastri CO, Gibreel A, Raine-Fenning N, *et al*. Endometrial injury in women undergoing  
26 assisted reproductive techniques. *Cochrane database Syst Rev* 2012;**7**:CD009517.  
27 doi:10.1002/14651858.CD009517.pub2  
28  
29 17 NHS reference costs 2012/13. 2013.  
30  
31 18 Curtis L. Unit costs of health and social care 2013. 2013.  
32  
33 19 Annual survey for hours and earnings (ASHE). 2012.  
34 [http://www.ons.gov.uk/ons/rel/ashe/annual-survey-of-hours-and-earnings/2012-](http://www.ons.gov.uk/ons/rel/ashe/annual-survey-of-hours-and-earnings/2012-revised-results/index.html)  
35 [revised-results/index.html](http://www.ons.gov.uk/ons/rel/ashe/annual-survey-of-hours-and-earnings/2012-revised-results/index.html) (accessed 12 Sep 2014).  
36  
37  
38  
39  
40  
41  
42  
43  
44  
45  
46  
47  
48  
49  
50  
51  
52  
53  
54  
55  
56  
57

# BMJ Open

## Induced Endometrial Trauma (endometrial scratch) in the mid-luteal menstrual cycle phase preceding first cycle IVF/ICSI versus usual IVF/ICSI therapy: Study protocol for a randomised controlled trial.

|                                 |                                                                                                                                                                                                                                                                                                                                                                                                                                                                                                                                                                                                                                                                                                                                                                                                                      |
|---------------------------------|----------------------------------------------------------------------------------------------------------------------------------------------------------------------------------------------------------------------------------------------------------------------------------------------------------------------------------------------------------------------------------------------------------------------------------------------------------------------------------------------------------------------------------------------------------------------------------------------------------------------------------------------------------------------------------------------------------------------------------------------------------------------------------------------------------------------|
| Journal:                        | <i>BMJ Open</i>                                                                                                                                                                                                                                                                                                                                                                                                                                                                                                                                                                                                                                                                                                                                                                                                      |
| Manuscript ID                   | bmjopen-2017-020755.R1                                                                                                                                                                                                                                                                                                                                                                                                                                                                                                                                                                                                                                                                                                                                                                                               |
| Article Type:                   | Protocol                                                                                                                                                                                                                                                                                                                                                                                                                                                                                                                                                                                                                                                                                                                                                                                                             |
| Date Submitted by the Author:   | 18-Jan-2018                                                                                                                                                                                                                                                                                                                                                                                                                                                                                                                                                                                                                                                                                                                                                                                                          |
| Complete List of Authors:       | Pye, Clare; Sheffield Teaching Hospitals NHS Foundation Trust, Obstetrics, Gynaecology & Neonatology<br>Chatters, Robin; University of Sheffield, Health and Related Research<br>Cohen, Judith; The University of Sheffield, School of Health and Related Research (SchARR)<br>Brian, Kate; Fertility UK<br>Cheong, Ying; University of Southampton, Obstetrics and Gynaecology<br>Laird, Susan; Sheffield Hallam University<br>Mohiyiddeen, Lamiya; Central Manchester University Hospitals NHS Foundation Trust, Department Of Reproductive Medicine<br>Skull, Jonathan; Jessop Wing Hospital<br>Walters, Stephen; University of Sheffield, SchARR<br>Young, T; The University of Sheffield, SchARR<br>Metwally, Mostafa; Sheffield Teaching Hospitals NHS Foundation Trust, Obstetrics, Gynaecology & Neonatology |
| <b>Primary Subject Heading</b>: | Reproductive medicine                                                                                                                                                                                                                                                                                                                                                                                                                                                                                                                                                                                                                                                                                                                                                                                                |
| Secondary Subject Heading:      | Obstetrics and gynaecology                                                                                                                                                                                                                                                                                                                                                                                                                                                                                                                                                                                                                                                                                                                                                                                           |
| Keywords:                       | Endometrial Trauma, Endometrial Scratch, IVF, Assisted Conception                                                                                                                                                                                                                                                                                                                                                                                                                                                                                                                                                                                                                                                                                                                                                    |
|                                 |                                                                                                                                                                                                                                                                                                                                                                                                                                                                                                                                                                                                                                                                                                                                                                                                                      |

SCHOLARONE™  
Manuscripts

**Title**

Induced Endometrial Trauma (endometrial scratch) in the mid-luteal menstrual cycle phase preceding first cycle IVF/ICSI versus usual IVF/ICSI therapy: Study protocol for a randomised controlled trial.

**Author (and corresponding author):**

Clare Pye- RN

Lead Research Nurse/Clinical Trial Co-ordinator – Endometrial Scratch Trial

Rm 32, level 4. Jessop Wing

Sheffield Teaching hospitals NHS Foundation Trust

Tree Root Walk,

Sheffield. S10 2SF

Tel: 0114 2268194

E-mail: clare.pye@sth.nhs.uk

**Co-Authors**

Robin Chatters- Trial Manager

University of Sheffield- Clinical Trials Research Unit

Sheffield-UK

Dr Judith Cohen - Research Fellow/ Assistant Director CTRU - Design, Trials and Statistics (DTS). Research Fellow - The NIHR Research Design Service for Yorkshire & the Humber.

School of Health and Related Research (SchARR)

University of Sheffield

Sheffield.

UK

Ms Kate Brian - Patient & Public Involvement (PPI)

Fertility Network UK

London.

UK

Professor Ying Cheong - Professor of Reproductive Medicine, Honorary Consultant in Reproductive Medicine and Surgery.

Complete Fertility Centre Southampton

University Hospital Southampton NHS Foundation Trust.

Southampton.

UK

Endometrial Scratch protocol paper for the BMJ open. Version 1.1 dated 18/01/2018

For peer review only - <http://bmjopen.bmj.com/site/about/guidelines.xhtml>

1  
2  
3 Dr Susan Laird – Head of the Department of Biosciences and Chemistry  
4 Biomedical Research Centre  
5 Sheffield Hallam University  
6 Sheffield.  
7  
8 UK  
9

10  
11 Dr Lamiya Mohiyiddeen - Consultant Gynaecologist and Subspecialist in Reproductive  
12 Medicine and Surgery  
13 Saint Mary's Hospital - Central Manchester University Hospitals  
14 Manchester.  
15  
16 UK  
17

18  
19 Mr Jonathan Skull – Consultant in Reproductive Medicine  
20 Fertility Unit - Jessop Wing  
21 Sheffield Teaching Hospitals NHS Foundation Trust  
22 Sheffield.  
23  
24 UK  
25

26  
27 Professor Stephen Walters - Trial Statistician  
28 School of Health and Related Research and  
29 NIHR Research Design Service Yorkshire and the Humber  
30 University of Sheffield  
31 Sheffield.  
32  
33 UK  
34

35  
36 Dr Tracey Young - Senior Researcher in Health Economics  
37 Senior Researcher in Health Economics  
38 Health Economics & Design Science  
39 (SchARR)  
40 University of Sheffield  
41 Sheffield.  
42  
43 UK  
44

45  
46 Mr Mostafa Metwally MD FRCOG - Consultant Gynaecologist and Subspecialist in  
47 Reproductive Medicine and Surgery  
48 Fertility Unit - Jessop Wing  
49 Sheffield Teaching Hospitals NHS Foundation Trust  
50 Sheffield.  
51  
52 UK  
53  
54  
55  
56  
57

58 Endometrial Scratch protocol paper for the BMJ open. Version 1.1 dated 18/01/2018

59 For peer review only - <http://bmjopen.bmj.com/site/about/guidelines.xhtml>  
60

**Key words:**

Endometrial Scratch

In Vitro Fertilisation

Endometrial Trauma

Assisted Conception

Randomised Controlled Trial

**Abstract****Introduction**

Endometrial Trauma commonly known as Endometrial Scratch (ES) has been shown to improve pregnancy rates in women with a history of repeated implantation failure undergoing In Vitro Fertilisation (IVF), with or without Intracytoplasmic Sperm Injection (ICSI). However, the procedure has not yet been fully explored in women having IVF/ICSI for the first time. This study aims to examine the effect of performing an ES in the midluteal phase prior to first time IVF/ICSI cycle on the chances of achieving a clinical pregnancy and live birth. If ES can influence this success rate there would be a significant cost saving to the NHS through decreasing the number of IVF/ICSI cycles necessary to achieve a pregnancy, increase the practice of single embryo transfer (SET) and consequently have a large impact on risks and costs associated with multiple pregnancies.

**Methods & Analysis**

This 30 month, UK, multi-centre, parallel group, RCT includes a 9month internal pilot and health economic analysis recruiting 1044 women from 16 Fertility Units. It will follow up participants to identify if IVF/ICSI has been successful and live birth has occurred up to 6 weeks post-partum. Primary analysis will be on an intention to treat basis. A sub-study of endometrial samples obtained during the ES will assess the role of immune factors in embryo implantation. Main trial recruitment commenced January 2017 and is ongoing.

Participants randomised to the intervention group will receive the ES procedure in the mid luteal phase prior to first time IVF/ICSI treatment versus usual IVF/ICSI treatment in the control group, with 1:1 randomisation. The primary outcome is live birth rate (LBR) after completed 24 weeks gestation.

**Ethics and dissemination**

South Central – Berkshire NREC approved the protocol. Findings will be submitted to peer-reviewed journals and abstracts will be submitted to relevant national and international conferences.

Endometrial Scratch protocol paper for the BMJ open. Version 1.1 dated 18/01/2018

For peer review only - <http://bmjopen.bmj.com/site/about/guidelines.xhtml>

Trial Registration number: ISRCTN: 23800982. Protocol Date: Version 5 Dated 20/07/2017

### Strengths and limitations of this study

- This is the largest multicentre, pragmatic randomised controlled trial to date which aims to assess the effectiveness and cost effectiveness of performing the ES procedure in women having IVF/ICSI for the first time
- It aims to determine whether performing an ES is an acceptable and well tolerated procedure.
- Due to the nature of the intervention it is not possible to blind study participants or clinicians.
- Potential difficulty with recruitment if patients are not in equipoise about effectiveness of the ES procedure in first time IVF/ICSI cycles.

### Background

The use of local endometrial trauma known as Endometrial Scratch (ES) to improve implantation rates in women undergoing assisted conception was first described in 2003 [1]. The procedure has since been explored in several studies mainly focusing on women with recurrent implantation failure and has been shown to significantly increase pregnancy rates by almost double [2–4]. However, uncertainty remains as to the therapeutic effect of ES, due to heterogeneity of the populations included - and the timing and exact protocol of ES used - in previous evaluations [5,6]. Three systematic reviews have summarised the evidence, however each included different studies [2,7,8]. A recent Cochrane review included fourteen randomised studies; seven in women with previous cycle failure, five in an unselected population and one in a first-time cycle [8]. The live birth rate meta-analysis combined trials regardless of the population (i.e. number of previous IVF cycles) and included five studies, reporting a risk ratio (RR) of 1.42 (1.08, 1.85),  $p=0.02$ . The odds of achieving a clinical pregnancy were also increased following ES with a RR of 1.34 (1.11, 1.62),  $p=0.002$ . The one trial conducted in women undergoing their first IVF cycle indicated the procedure was harmful with an OR of clinical pregnancy rate of 0.30 (0.14, 0.63)  $p=0.002$  [9]. Notably, this trial performed the ES procedure at the time of oocyte retrieval and not in the month prior to the IVF cycle. Despite the concerns around the quality of evidence in using ES and that many of the trials undertaken so far have been small (most <150 participants), ES has been widely adopted into routine clinical practice in women with recurrent unsuccessful implantation and is currently being provided in some fertility units where women are having IVF/ICSI for the first time [10,11]. Two large trials are currently in progress to determine if ES is beneficial in women undergoing their 2<sup>nd</sup> IVF cycle [12] and a sample of women undergoing any IVF cycle [13]. Therefore, given the lack of evidence for the effectiveness of ES in women undergoing their 1<sup>st</sup> cycle of IVF/ICSI, it is essential that a large well controlled multi-centre trial is conducted to fully investigate the effectiveness and safety of this technique.

1  
2  
3 The Human Fertilisation and Embryology Authority (HFEA) state in their statistical report  
4 into multiple births that the risks associated with multiple births is the single biggest health  
5 risk associated with fertility treatment [14]. Multiple births carry risks to the health of both  
6 the mother and the babies and that birth of a healthy singleton child, born at full term, is  
7 therefore the safest outcome of fertility treatment for both mother and child and is best  
8 achieved through promoting the practice SET.  
9

10  
11 If ES can improve the implantation potential of the embryo and therefore improve success  
12 rates, ES may encourage an expansion of current SET policies. Inclusion of women with a  
13 lower chance of having cryopreserved embryos and a more general increase in the  
14 implementation of the practice of SET, could consequently have a large impact on the risks  
15 and costs associated with multiple pregnancies as a result of IVF [15].  
16  
17

18  
19 The exact mechanism by which ES may improve implantation is not yet known, however it is  
20 known that implantation is a complex process involving a number of inflammatory  
21 mediators including uterine natural killer cells, leukaemia inhibitory factor and interleukin  
22 15 [13]. It is possible that ES may lead to the activation of inflammatory cells such as  
23 macrophages and dendritic cells, and release of inflammatory mediators such as tumour  
24 necrosis factor- $\alpha$ , interleukin-15, growth-regulated oncogene- $\alpha$  and macrophage  
25 inflammatory protein 1B [14].  
26  
27

28  
29 ES has also been shown to cause the modulation of several endometrial genes that may be  
30 involved in membrane stability during the process of implantation such as bladder  
31 transmembranal protein (UPIb) and adipose differentiation-related protein and mucin 1  
32 [16].  
33  
34

35 ES is routinely performed as an outpatient procedure. Risks have been identified in a  
36 previous study when the procedure was undertaken on the day of oocyte retrieval (reduced  
37 implantation and pregnancy rates) [9]; however, the procedure is not known to be  
38 associated with any particular risks when undertaken in the menstrual cycle preceding that  
39 of IVF therapy, apart from period like discomfort whilst performing the procedure. Taking  
40 simple analgesics prior to the procedure usually alleviates this. As with any intrauterine  
41 procedure there is a potential for intrauterine infection. However women attending for  
42 fertility treatment are usually screened for serious vaginal infections such as chlamydia to  
43 minimise the risk of any spread of infection when performing the embryo transfer  
44 procedure, a similar procedure to an ES as it involves the insertion of a catheter into the  
45 uterine cavity.  
46  
47  
48  
49

50 The main objectives of this trial are to assess the clinical and cost effectiveness of the ES  
51 procedure in women aged between 18 and 37 years (inclusive) undergoing their first  
52 IVF/ICSI cycle using either antagonist or long protocols to see if it could potentially improve  
53 implantation rates and hence encourage the practice of single embryo replacement. A sub-  
54 study will be undertaken in two of these fertility units) where endometrial samples obtained  
55  
56  
57

58 Endometrial Scratch protocol paper for the BMJ open. Version 1.1 dated 18/01/2018

59 For peer review only - <http://bmjopen.bmj.com/site/about/guidelines.xhtml>  
60

1  
2  
3 from the ES procedure will be stored for later analysis to identify endometrial factors  
4 associated with successful pregnancy outcome.  
5

### 6 **Method and Analysis**

7 The Endometrial Scratch Trial is a multi-centre, parallel group, randomised controlled trial to  
8 examine the clinical, cost effectiveness and safety of an ES performed in the mid-luteal  
9 phase prior to a first time IVF/ICSI cycle. Eligible participants will be randomised to either  
10 the treatment as usual (TAU) arm, consisting of usual IVF treatment, or the intervention arm  
11 where ES will be performed followed by usual IVF treatment. The overall study design is  
12 illustrated below in the study flow chart (figure 1).  
13  
14  
15

### 16 **Figure 1. Study flow chart.**

17  
18  
19  
20  
21  
22 The trial consists of two phases - an internal pilot to assess feasibility of recruitment and  
23 delivery of the intervention, and a two year main recruitment phase.  
24

25  
26 The trial will commence with a 9 month internal pilot recruitment phase across  
27 approximately 6 UK fertility units to justify whether or not the recruitment strategy and the  
28 scheduling of the endometrial scratch procedure are feasible and will use the same trial  
29 procedures as described for the main trial.  
30

31  
32 The trial is collaboration between research staff at The Jessop Wing, Sheffield Teaching  
33 Hospital NHS Foundation Trust & the University of Sheffield - Clinical Trials Research Unit  
34 (CTRU) who are responsible for the conduct of the trial. Funding to run the trial has been  
35 awarded by the National Institute of Healthy Research (NIHR) Health Technology  
36 Assessment (HTA). At the end of the pilot phase, the Trial Steering Committee (TSC) will  
37 report to the funder on whether the feasibility criteria have been met and whether the trial  
38 should continue.  
39

40  
41 The trial will be conducted in compliance with the protocol, GCP and regulatory  
42 requirements. Main trial recruitment commenced January 2017 and is ongoing.  
43  
44

45 Sheffield CTRU will aggregate feasibility of the research and intervention protocols based on  
46 the following outcomes.  
47

48 The trial will be considered infeasible and will be stopped if either of the following  
49 conditions apply:  
50

51 1. Feasibility of recruitment to the main trial: defined as recruitment of fewer than 108  
52 participants (75% of the 144 target) during the internal pilot phase.  
53

54 2. Scheduling of the ES procedure: defined as less than 75% of women scheduled to receive  
55 their ES procedure have received the ES at the correct time point.  
56  
57

58 Endometrial Scratch protocol paper for the BMJ open. Version 1.1 dated 18/01/2018  
59



## Recruitment

Upon successful completion of the pilot the main trial will aim to recruit women attending 16 UK Fertility Units for first time IVF treatment. Participation is entirely voluntary and choosing not to participate will not negatively influence the woman's treatment in any way. Furthermore consent can be withdrawn at any stage. Women who are about to undergo their first cycle of IVF/ICSI will be identified by screening patients referred for these treatments. Eligible women will be sent information regarding the trial in the post or via e-mail or may be alerted to the trial via the trial website or posters displayed at the fertility unit. If they are interested in participating they will be invited to discuss the trial with their fertility team at their next routine appointment.

Prior to randomisation full written informed consent will be obtained by a suitably trained Doctor or Research Nurse/Midwife at a clinic visit. The participant will complete a study specific resource use questionnaire prior to randomisation to collect health care usage in the previous 3 months; baseline data will be collected at this visit and participants will be randomly allocated to either the intervention or usual care arm of the trial.

Detailed methods of the Endometrial Scratch trial are described in the Endometrial Scratch protocol available on the website – <https://www.sheffield.ac.uk/scratchtrial>

Women will be included and considered suitable if they meet the following eligibility criteria:

### Inclusion criteria

1. Women expected to be aged between 18 and 37 years (inclusive) at time of egg collection.
2. First time IVF with or without ICSI treatment using the antagonist or long protocol only
3. Expected to receive treatment using fresh embryos.
4. Expected good responders to treatment, with:
  - a. Ovulatory menstrual cycle (Regular menstrual cycles defined by clinical judgement or with ovulatory levels of midluteal serum progesterone as defined by local laboratory protocols)
  - b. Normal uterine cavity (assessed by transvaginal sonography at screening and no endometrial abnormalities such as , suspected intrauterine adhesions, uterine septa, submucosal fibroids or intramural fibroids exceeding 4 cm in diameter as assessed by the investigator that would require treatment to facilitate pregnancy).
  - c. Expected good ovarian reserve (assessed clinically, biochemically (FSH< 10 & normal follicular phase oestradiol levels and or normal AMH), and or sonographically (antral follicle counts) and no history of previous radiotherapy or chemotherapy). [All laboratory/ultrasound standards based on local normal reference ranges.]
  - d. Single embryo transfer (SET) expected.
5. Local procedures have been / will be followed to exclude relevant vaginal/uterine infections prior to starting treatment.

Endometrial Scratch protocol paper for the BMJ open. Version 1.1 dated 18/01/2018

For peer review only - <http://bmjopen.bmj.com/site/about/guidelines.xhtml>

6. Willing to use an appropriate method of barrier contraception if randomised to Endometrial Scratch (ES) in the cycle where the ES procedure is performed. .
7. Understands/willing to comply with the protocol.

### **Exlcusion criteria**

1. Previous trauma/surgery to the endometrium (e.g. resection of submucous fibroid, intrauterine adhesions.)
2. BMI of 35 kg/m<sup>2</sup> or greater
3. Known grade 4 (severe) endometriosis
4. Currently participating in any other fertility study involving medical/surgical intervention
5. Expected to receive protocols other than antagonist or long (e.g. ultra-long protocol)
6. An endometrial scratch (or similar procedure, e.g. endometrial biopsy for the collection of Natural Killer Cells) is planned
7. Previously randomised into this trial

### **Sampling**

The primary outcome is the LBR. This is defined as a live birth after completed 24 weeks gestation, within the 10.5 month post egg collection follow-up period. This time-period will enable the collection of any neonatal deaths (up to 6 weeks post-partum). The denominator for calculating the LBR will be the number of women randomised to each group. Data from the HFEA suggests a live birth rate of 32.8% in women under 35 and 27.3 % in women aged 35-37. The sample size calculation assumes a 30% LBR in the control group and that an absolute increase of 10%, to a 40% LBR (a relative risk of 1.33) in the intervention groups is of clinical and practical importance. The effect size, a 10% absolute difference in LBR, we are proposing is large but we believe an effect of such magnitude is needed to change clinical practice (there is a 5% absolute difference in LBR between women aged under 35 and 35-37) and is less than that observed in the systematic reviews described above (where, at the time of sample size calculation, the relative risk estimates for live birth ranged from 1.83 to 2.46) [2,17]. To have a 90% power of detecting this difference or more, in LBR rates between the groups, as statistically significant at the 5% two-sided level, will require 496 women per group (992 in total). Adjusting for a predicted drop-out rate of 5% (due to anticipated difficulties of follow-up for patients who have been referred from NHS Trusts other than the participating Fertility Unit) we will require 1044 participants.

### **Study procedures**

Following randomisation women in the intervention arm will have the ES procedure performed in the midluteal phase of their cycle prior to their planned IVF/ICSI cycle in the outpatient setting of the fertility unit. The choice of screening for infection prior to the procedure or the administration of antibiotics will be left to individual units according to their local established protocols and procedures. Women can be randomised any time up until they start their IVF cycle, although it may be necessary for the participant to delay her

1  
2  
3 IVF if randomised to the intervention arm. This decision to delay should be made and agreed  
4 by both the patient and her fertility team before randomisation is undertaken. The oral  
5 contraceptive pill can be used following randomisation for the purposes of cycle  
6 programming but women must be having ovulatory periods at the point of entry into the  
7 trial. Women randomised to TAU will continue with their IVF/ICSI as planned and will not  
8 receive the ES procedure.  
9  
10

11 Following delivery of the ES, participants will undergo IVF/ICSI in line with local procedures.  
12 Following successful embryo transfer (in both groups) a pregnancy test will be performed  
13 and adverse events will be collected. In cases where women do not undergo embryo  
14 transfer, every effort will be made by the research team to collect any adverse event  
15 information from either the patient or the medical notes. If a pregnancy is confirmed the  
16 woman is discharged to normal antenatal care as per standard practice. It is the intention to  
17 obtain the pregnancy status of all women once randomised including the outcome of all  
18 spontaneous pregnancies, the first frozen embryo transfer if no fresh transfer has been  
19 undertaken as well as those that delay treatment following the ES. Women will not be  
20 followed-up if they withdraw their consent from the trial. Data will also be collected  
21 regarding participants who have received an ES outside the trial.  
22  
23  
24  
25  
26

### 27 **Randomisation**

28 The randomisation schedule will be generated by Sheffield CTRU prior to the start of the  
29 trial; access to the schedule will be limited only to the trial statistician. The randomisation  
30 sequence will be computer generated and stratified by site and protocol (antagonist or long  
31 protocol). Random permuted blocks of variable size will be used to ensure enough  
32 participants are allocated evenly to each arm of the trial at each site. Research staff at  
33 recruiting centres will be unable to access the randomisation sequence and will use a web  
34 based computer system with restricted access rights to enter participant details;  
35 randomisation outcome will then be revealed. Re-randomisation will not be permitted.  
36  
37  
38  
39

### 40 **Trial Intervention**

41 ES is a minor procedure of 10 to 20 minute duration that will be performed in an outpatient  
42 setting at local IVF centres in line with local procedures and the trial standard operation  
43 procedure (SOP). The participant will be required to use a barrier method of contraception  
44 (if necessary) during the menstrual cycle in which the ES will be performed. During ES, a  
45 speculum is inserted into the vagina and the cervix exposed and cleaned. A pipelle or similar  
46 endometrial sampler is then inserted into the cavity of the uterus; negative pressure is  
47 applied by withdrawal of the plunger. The sampler is rotated and withdrawn several times  
48 so that tissue appears in the transparent tube. The sampler and speculum are then  
49 removed. If no tissue is seen in the transparent sampler, this is an indication that the  
50 sampler was not fully inside the uterine cavity and therefore the procedure is repeated.  
51 Following the procedure women will complete a visual pain scale (likert) to assess their pain  
52  
53  
54  
55  
56  
57

1  
2  
3 and tolerability assessment of the procedure within 30 minutes of the initial ES and then  
4 again at 24 hours and 7 days post procedure via an automated text message.  
5

6 Compliance to the intervention will be ascertained through the clinician or Research  
7 Nurse/Midwife recording whether or not the patient has a) attended the clinic for the ES  
8 procedure and b) received the ES procedure as per protocol. Any deviation from the  
9 protocol will be noted and reported as per the Sheffield CTRU SOP.  
10  
11

### 12 **Follow-up**

13 Patient follow up will continue until either the 1st cycle of IVF has been completed or the  
14 resulting pregnancy has concluded. If no pregnancy is confirmed the study is complete  
15 (regardless of which group the woman is randomised to). Pregnant women will be followed-  
16 up at 3 and 6 months post egg collection and then 6 weeks post-partum to collect  
17 pregnancy outcome and safety data. If the pregnancy is ongoing at 3 months and 6 week  
18 post-partum, a health resource use questionnaire will be sent to the patient for completion.  
19 If a spontaneous pregnancy is achieved between randomisation and IVF treatment, the  
20 pregnancy will be followed up as described above, instead of egg collection, the date of the  
21 last menstrual period (LMP) will be used to schedule the 3/6 month & 6 week post-partum  
22 follow ups.  
23  
24  
25  
26

### 27 **Safety considerations, safety monitoring and AE reporting**

28 All Adverse Events (AEs) and Serious Adverse Events (SAE) will be recorded by the local  
29 research team at each Fertility Unit. All AEs/SAEs will be followed up until satisfactory  
30 resolution or until the treating clinician and the principal investigator deems the event to be  
31 chronic or the participant to be stable. Research Nurses/Midwives will ask patients for any  
32 details of adverse events at five time-points: post procedure (if randomised to receive ES),  
33 at the participants' pregnancy test, and then, if pregnancy has been achieved, at 3 and 6  
34 months post egg collection and finally 6 weeks post-partum.  
35  
36  
37  
38

39 AEs/SAEs will be collected up to the participants' final study related follow-up event. If  
40 embryo transfer does not occur, the Research Nurse/Midwife will contact the participant  
41 approximately 2 weeks after egg collection to identify if any adverse events have occurred.  
42 In the case of a negative pregnancy test, the site research team should make every effort to  
43 obtain AE data from the patient or the medical notes at routine clinical care contacts; no  
44 further contact will be made outside of routine clinical care.  
45  
46  
47  
48

49 Expected AEs will be those which occur regularly due to pregnancy, and expected SAEs are  
50 those events which are expected in the patient population as a result of the routine  
51 care/treatment of a patient. Expected SAEs and all AEs will be collected as part of the trial  
52 and entered into the eCRF, but will not be reported to regulatory bodies (NHS REC/sponsor).  
53 Unexpected SAEs will be reported to the Sheffield CTRU as soon as staff at the fertility unit  
54 becomes aware of the event.  
55  
56  
57

58 Endometrial Scratch protocol paper for the BMJ open. Version 1.1 dated 18/01/2018

All SAEs will be reviewed by the Data Monitoring & Ethics Committee (DMEC) and Trial Management Group (TMG) at regular intervals. The Chief Investigator (CI) will inform all Principal Investigators (PIs) concerned of relevant information that would adversely affect the safety of the participants.

## Outcomes

### Primary clinical outcome

- Live birth rate; based on the number of live births after 24 weeks gestation within the 10.5 month post egg collection follow-up period.

### Secondary outcomes

- Acceptability and pain rating of the Endometrial Scratch procedure, a visual pain scale (likert) to assess their pain and tolerability assessment of the procedure within 30minutes of the initial ES procedure, 1 day later and then again 7 days after the ES.
- Implantation rate based on a positive serum Beta hCG on approximately day 14 following the egg collection or by a positive urine pregnancy test.
- Clinical pregnancy rate; an observation of viable intrauterine pregnancy with a positive heart pulsation seen on ultrasound at/after 8 weeks gestation
- Miscarriage rate as measured by spontaneous pregnancy loss (including pregnancy of unknown location (PUL) prior to 24 weeks gestation within the 10.5 month post egg collection follow-up period
- Ectopic pregnancy as measured by the rate of pregnancy outside the normal uterine cavity
- Multiple birth rate, defined as the birth of more than one living foetus after completed 24 weeks gestation
- Preterm delivery rate as measured by live birth after 24 weeks before 37 weeks gestation within the 10.5 month post egg collection follow-up period.
- Still birth rate based on the delivery of a still born foetus showing no signs of life after 24 weeks gestation within the 10.5 month post egg collection follow-up period.
- Details of participant's IVF cycles including number of eggs retrieved, number of embryos generated 1 day after egg collection, quality of the embryos transferred (using NEQAS grading) and the number of embryos replaced and day of embryo replacement.
- Adverse events
- Health resource use of the participant & patient costs

The trial includes a health economic component to assess the cost of the intervention per extra live birth from an NHS and social care perspective. Resource use will include the intervention costs for ES, the cost of IVF treatment, visits to the assisted conception unit and for those who conceive antenatal and post-natal visits, delivery costs and any hospital stays not related to birth for both mother and baby. The resource use questionnaire will collect

Endometrial Scratch protocol paper for the BMJ open. Version 1.1 dated 18/01/2018

For peer review only - <http://bmjopen.bmj.com/site/about/guidelines.xhtml>

1  
2  
3 information on contacts with midwife and GP visits. A Patient Cost questionnaire will collect  
4 time taken to travel to appointments and loss of productivity. Unit costs will be derived  
5 from appropriate national sources and will include; NHS reference costs, Personal Social  
6 Service Research Unit costs and the **Office of National Statistics** [18–20]. The resource use  
7 questionnaire will be designed for this study and will draw on data collection tools  
8 developed in The School of Health and Related Research (SchARR) and those collated by the  
9 Database for Instruments for Resource Use Measurement (DIRUM).  
10  
11

### 12 13 **Blinding**

14 Due to the nature of the intervention, it will not be possible to blind patients or clinicians to  
15 treatment allocation and since this trial evaluates objectively measured outcomes  
16 (pregnancy rates) that are unlikely to be affected by a placebo effect, it is not necessary to  
17 perform a sham procedure for the control group. The study statistician, TSC and health  
18 economist will be blinded to the allocation.  
19  
20  
21  
22

### 23 **Trial monitoring and oversight committees**

24 The trial will be overseen by the TSC and the DMEC, membership of both will consist of  
25 independent experts in the field. The TSC will include a patient representative. Both  
26 committees will review recruitment, study progress and adverse events. The DMEC will  
27 receive monthly reports of recruitment and adverse events and, at their meetings, will also  
28 consider emerging evidence from other trials or research on ES. They may advise the chair  
29 of the TSC at any time if, in their view, the trial should be stopped for ethical reasons,  
30 including concerns about patient safety.  
31  
32  
33

34 Day-to-day running of the trial will be coordinated by the Trial Management Group (TMG),  
35 consisting of the grant co-applicants, plus members of the Jessop Wing Fertility Unit,  
36 Sheffield CTRU and patient representatives.  
37  
38

### 39 **Statistical analysis**

40 Primary analysis will be performed on the intention to treat population (all participants  
41 randomised into the trial). All statistical exploratory tests will be two-tailed at 5% nominal  
42 level. Baseline demographic (e.g. age), physical measurements (e.g. BMI), and health-related  
43 data will be described and summarised overall and for both treatment groups. The women,  
44 not the IVF cycle will be the unit of analysis. If the woman fails to get pregnant or does not  
45 have IVF treatment, they will be included in the analysis of the primary outcome as a  
46 negative outcome (i.e. non-live birth). For sensitivity analyses, per protocol (PP) analyses will  
47 also be undertaken which will be defined as for Endometrial Scratch participants in the  
48 intervention group, receiving the ES procedure as documented in the study protocol and  
49 undergoing IVF/ICSI in the subsequent menstrual cycle, including embryo transfer. For the  
50 control group, the PP population will receive IVF/ICSI including embryo transfer. Sub-group  
51 analyses will be undertaken to explore the effect of important variables related to the  
52  
53  
54  
55  
56  
57

1  
2  
3 participant and their treatment on the primary and secondary outcomes. These subgroups  
4 are:

- 5 • Day of embryo transfer (day 2, 3, 4, 5 or 6),
- 6 • Fertilisation method (IVF, IVF or ICSI, ICSI [spilt]),
- 7 • Type of protocol (long or antagonistic),
- 8 • Embryo transfer (single or double) and whether the embryo was fresh or frozen
- 9 • Previous history of consecutive miscarriages (0-2 vs  $\geq 3$ )

10  
11  
12  
13  
14  
15  
16  
17 AEs will be reported as a proportion of all women randomised. Adverse events including  
18 serious adverse events will be compared between the two groups using a Fisher's Exact  
19 test, Chi-squared test or negative binomial regression model in case of repeated events per  
20 woman (as appropriate). A 95% CI for the difference in adverse event rate between the  
21 groups will also be calculated with associated point estimate depending on the method  
22 used.

23  
24  
25  
26  
27  
28  
29 Health economic results will be presented in the net-benefit framework and will allow for  
30 uncertainty using bootstrapping and probabilistic sensitivity analysis.

### 31 **Ethics and dissemination**

32  
33  
34  
35  
36  
37  
38  
39  
40  
41  
42  
43  
44  
45  
46  
47  
48  
49  
50  
51  
52  
53  
54  
55  
56  
57  
58  
59  
60  
The study is registered on the ISRCTN database (reference 23800982) and has been  
approved by the South Berkshire Research Ethics Committee (reference 16/SC/0151). The  
findings of this trial will be submitted to peer-reviewed journals and abstracts to national  
and international conferences. Other stakeholder specific outputs in relevant formats will  
also be produced for commissioners, IVF practitioners, third sector and user advocacy  
organisations. A website will be established to promote the work of the trial. All knowledge  
transfer activity including translation will be informed by input from trial collaborators, the  
TSC and TMG to ensure the study is meeting the needs of the commissioners and audience.

### 61 **Discussion**

62  
63  
64  
65  
66  
67  
68  
69  
70  
71  
72  
73  
74  
75  
76  
77  
78  
79  
80  
81  
82  
83  
84  
85  
86  
87  
88  
89  
90  
91  
92  
93  
94  
95  
96  
97  
98  
99  
100  
This trial will determine whether performing an ES procedure prior to 1st time IVF/ICSI  
treatment is an inexpensive, safe and well tolerated procedure that increases the live birth  
rate in women having SET. If shown to be the case, this will have a significant improvement  
in first cycle IVF success rates and potentially lead to significant cost savings to the NHS as  
fewer women would need to have repeat treatment cycles. This is particularly important in  
the current economic climate and with restrictions on funding and service provision. This  
will also have a significant impact for women, for whom the burden of repeated cycles is  
large.

### Acknowledgements

We thank Dr Munya Dimairo - Research Fellow in Medical Statistics at the University of Sheffield for his contribution to the design/content of the protocol, The Jessop Wing Reproductive Health Public Advisory Panel as well as each local PI, Research Nurse/Midwife and research delivery team in the recruitment and management of patients.

### Authors Contributions

Contributors: MM, CP, JC, KB, YC, SL, LM, JS, SW & TY conceived the study, and contributed to study design, sample size calculations and analytical plans.

MM, CP, RC, JC, KB, YC, SL, LM, JS, SW & TY initiated the project, have assisted in developing the protocol and helped with implementation.

CP, RC, JC, & MM drafted the manuscript. All authors read and approved the final manuscript.

### Competing interests

None declared.

### Funding statement

This trial was funded by the NIHR Health Technology Assessment program grant number [14/08/45]

This article presents independent research supported by the National Institute for Health Research (NIHR). The views expressed are those of the author(s) and not necessarily those of the NHS, the NIHR or the Department of Health

### References

- 1 Barash A, Dekel N, Fieldust S, *et al*. Local injury to the endometrium doubles the incidence of successful pregnancies in patients undergoing in vitro fertilization. *Fertil Steril* 2003;**79**:1317–22. doi:10.1016/S0015-0282(03)00345-5
- 2 El-Toukhy T, Sunkara S, Khalaf Y. Local endometrial injury and IVF outcome: A systematic review and meta-analysis. *Reprod Biomed Online* 2012;**25**:345–54. doi:10.1016/j.rbmo.2012.06.012
- 3 Raziel A, Schachter M, Strassburger D, *et al*. Favorable influence of local injury to the endometrium in intracytoplasmic sperm injection patients with high-order implantation failure. *Fertil Steril* 2007;**87**:198–201. doi:10.1016/j.fertnstert.2006.05.062
- 4 Huang SY, Wang C-J, Soong Y-K, *et al*. Site-specific endometrial injury improves implantation and pregnancy in patients with repeated implantation failures. *Reprod Biol Endocrinol* 2011;**9**:140. doi:10.1186/1477-7827-9-140
- 5 Simón C, Bellver J. Scratching beneath ‘the Scratching Case’: Systematic reviews and

Endometrial Scratch protocol paper for the BMJ open. Version 1.1 dated 18/01/2018

For peer review only - <http://bmjopen.bmj.com/site/about/guidelines.xhtml>



- metaanalyses, the back door for evidencebased medicine. *Hum. Reprod.* 2014;**29**:1618–21. doi:10.1093/humrep/deu126
- 6 Santamaria X, Katzorke N, Simón C. Endometrial ‘scratching’: What the data show. *Curr. Opin. Obstet. Gynecol.* 2016;**28**:242–9. doi:10.1097/GCO.0000000000000279
- 7 Potdar N, Gelbaya T, Nardo LG. Endometrial injury to overcome recurrent embryo implantation failure: a systematic review and meta-analysis. *Reprod Biomed Online* 2012;**25**:561–71. doi:10.1016/j.rbmo.2012.08.005
- 8 Nastri CO, Lensen SF, Gibreel A, *et al.* Endometrial injury in women undergoing assisted reproductive techniques. *Cochrane database Syst Rev* 2015;**3**:CD009517. doi:10.1002/14651858.CD009517.pub3
- 9 Karimzade MA, Oskouian H, Ahmadi S, *et al.* Local injury to the endometrium on the day of oocyte retrieval has a negative impact on implantation in assisted reproductive cycles: A randomized controlled trial. *Arch Gynecol Obstet* 2010;**281**:499–503. doi:10.1007/s00404-009-1166-1
- 10 Spencer EA, Mahtani KR, Goldacre B, *et al.* Claims for fertility interventions: a systematic assessment of statements on UK fertility centre websites. *BMJ Open* 2016;**6**:e013940. doi:10.1136/bmjopen-2016-013940
- 11 Lensen S, Sadler L, Farquhar C. Endometrial scratching for subfertility: Everyone’s doing it. *Hum Reprod* 2016;**31**:1241–4. doi:10.1093/humrep/dew053
- 12 van Hoogenhuijze NE, Torrance HL, Mol F, *et al.* Endometrial scratching in women with implantation failure after a first IVF/ICSI cycle; does it lead to a higher live birth rate? The SCRATCH study: A randomized controlled trial (NTR 5342). *BMC Womens Health* 2017;**17**. doi:10.1186/s12905-017-0378-y
- 13 Lensen S, Martins W, Nastri C, *et al.* Pipelle for Pregnancy (PIP): study protocols for three randomised controlled trials. *Trials* 2016;**17**:216. doi:10.1186/s13063-016-1301-9
- 14 Human Fertilisation & Embryology Authority. Improving outcomes for fertility patients: Multiple births. A statistical report. 2011.
- 15 Ledger WL, Anumba D, Marlow N, *et al.* The costs to the NHS of multiple births after IVF treatment in the UK. *BJOG* 2006;**113**:21–5. doi:10.1111/j.1471-0528.2005.00790.x
- 16 Kalma Y, Granot I, Gnainsky Y, *et al.* Endometrial biopsy-induced gene modulation: first evidence for the expression of bladder-transmembranal uroplakin Ib in human endometrium. *Fertil Steril* 2009;**91**:1042–9, 1049–9. doi:10.1016/j.fertnstert.2008.01.043
- 17 Nastri CO, Gibreel A, Raine-Fenning N, *et al.* Endometrial injury in women undergoing assisted reproductive techniques. *Cochrane database Syst Rev* 2012;**7**:CD009517. doi:10.1002/14651858.CD009517.pub2
- 18 NHS reference costs 2012/13. 2013.

- 1  
2  
3 19 Curtis L. Unit costs of health and social care 2013. 2013.  
4  
5 20 Annual survey for hours and earnings (ASHE). 2012.  
6 [http://www.ons.gov.uk/ons/rel/ashe/annual-survey-of-hours-and-earnings/2012-](http://www.ons.gov.uk/ons/rel/ashe/annual-survey-of-hours-and-earnings/2012-revised-results/index.html)  
7 [revised-results/index.html](http://www.ons.gov.uk/ons/rel/ashe/annual-survey-of-hours-and-earnings/2012-revised-results/index.html) (accessed 12 Sep 2014).  
8  
9  
10  
11  
12  
13  
14  
15  
16  
17  
18  
19  
20  
21  
22  
23  
24  
25  
26  
27  
28  
29  
30  
31  
32  
33  
34  
35  
36  
37  
38  
39  
40  
41  
42  
43  
44  
45  
46  
47  
48  
49  
50  
51  
52  
53  
54  
55  
56  
57

For peer review only

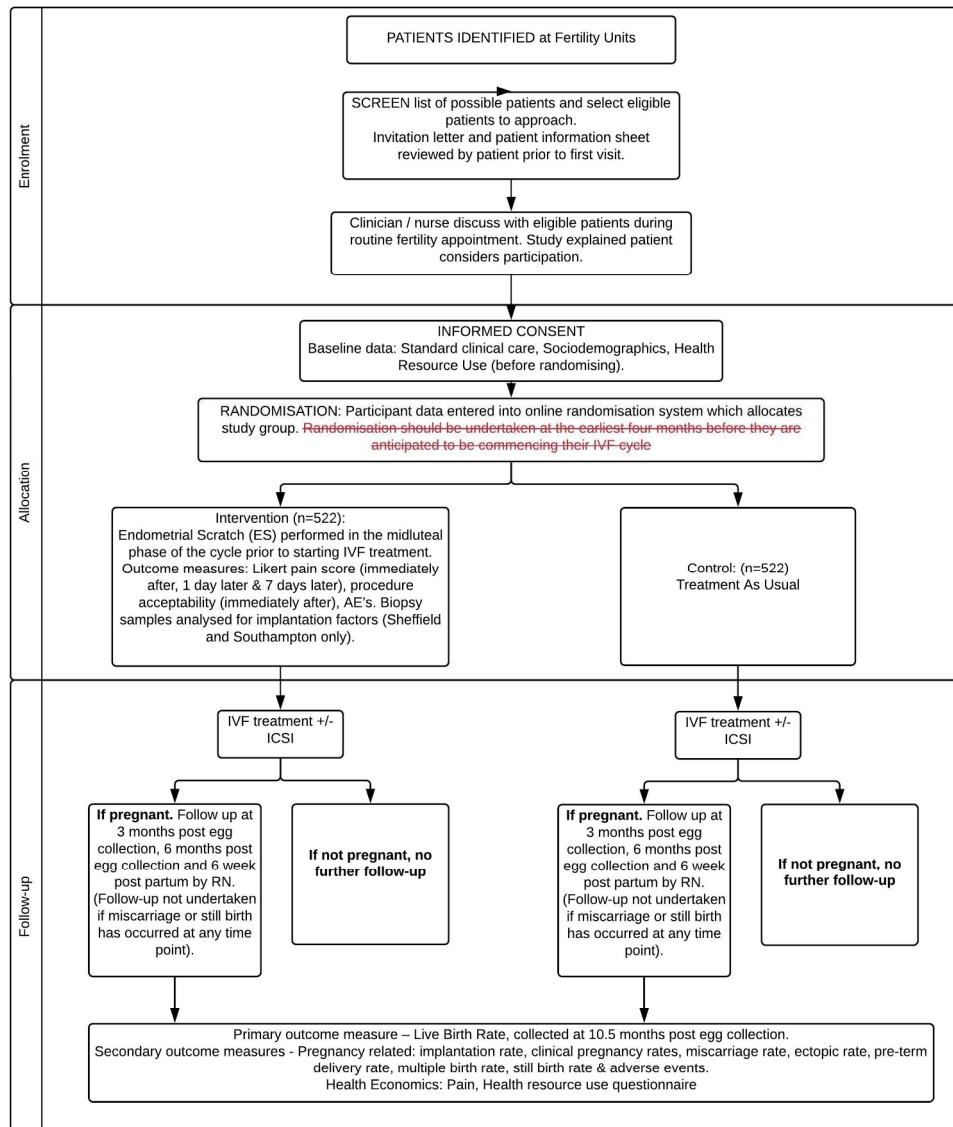

203x241mm (300 x 300 DPI)

# BMJ Open

## Induced Endometrial Trauma (endometrial scratch) in the mid-luteal menstrual cycle phase preceding first cycle IVF/ICSI versus usual IVF/ICSI therapy: Study protocol for a randomised controlled trial.

|                                 |                                                                                                                                                                                                                                                                                                                                                                                                                                                                                                                                                                                                                                                                                                                                                                                                                      |
|---------------------------------|----------------------------------------------------------------------------------------------------------------------------------------------------------------------------------------------------------------------------------------------------------------------------------------------------------------------------------------------------------------------------------------------------------------------------------------------------------------------------------------------------------------------------------------------------------------------------------------------------------------------------------------------------------------------------------------------------------------------------------------------------------------------------------------------------------------------|
| Journal:                        | <i>BMJ Open</i>                                                                                                                                                                                                                                                                                                                                                                                                                                                                                                                                                                                                                                                                                                                                                                                                      |
| Manuscript ID                   | bmjopen-2017-020755.R2                                                                                                                                                                                                                                                                                                                                                                                                                                                                                                                                                                                                                                                                                                                                                                                               |
| Article Type:                   | Protocol                                                                                                                                                                                                                                                                                                                                                                                                                                                                                                                                                                                                                                                                                                                                                                                                             |
| Date Submitted by the Author:   | 12-Mar-2018                                                                                                                                                                                                                                                                                                                                                                                                                                                                                                                                                                                                                                                                                                                                                                                                          |
| Complete List of Authors:       | Pye, Clare; Sheffield Teaching Hospitals NHS Foundation Trust, Obstetrics, Gynaecology & Neonatology<br>Chatters, Robin; University of Sheffield, Health and Related Research<br>Cohen, Judith; The University of Sheffield, School of Health and Related Research (SchARR)<br>Brian, Kate; Fertility UK<br>Cheong, Ying; University of Southampton, Obstetrics and Gynaecology<br>Laird, Susan; Sheffield Hallam University<br>Mohiyiddeen, Lamiya; Central Manchester University Hospitals NHS Foundation Trust, Department Of Reproductive Medicine<br>Skull, Jonathan; Jessop Wing Hospital<br>Walters, Stephen; University of Sheffield, SchARR<br>Young, T; The University of Sheffield, SchARR<br>Metwally, Mostafa; Sheffield Teaching Hospitals NHS Foundation Trust, Obstetrics, Gynaecology & Neonatology |
| <b>Primary Subject Heading</b>: | Reproductive medicine                                                                                                                                                                                                                                                                                                                                                                                                                                                                                                                                                                                                                                                                                                                                                                                                |
| Secondary Subject Heading:      | Obstetrics and gynaecology                                                                                                                                                                                                                                                                                                                                                                                                                                                                                                                                                                                                                                                                                                                                                                                           |
| Keywords:                       | Endometrial Trauma, Endometrial Scratch, IVF, Assisted Conception                                                                                                                                                                                                                                                                                                                                                                                                                                                                                                                                                                                                                                                                                                                                                    |
|                                 |                                                                                                                                                                                                                                                                                                                                                                                                                                                                                                                                                                                                                                                                                                                                                                                                                      |

SCHOLARONE™  
Manuscripts

**Title**

Induced Endometrial Trauma (endometrial scratch) in the mid-luteal menstrual cycle phase preceding first cycle IVF/ICSI versus usual IVF/ICSI therapy: Study protocol for a randomised controlled trial.

**Author (and corresponding author):**

Clare Pye- RN

Lead Research Nurse/Clinical Trial Co-ordinator – Endometrial Scratch Trial

Rm 32, level 4. Jessop Wing

Sheffield Teaching hospitals NHS Foundation Trust

Tree Root Walk,

Sheffield. S10 2SF

Tel: 0114 2268194

E-mail: clare.pye@sth.nhs.uk

**Co-Authors**

Robin Chatters- Trial Manager

University of Sheffield- Clinical Trials Research Unit

Sheffield-UK

Dr Judith Cohen - Research Fellow/ Assistant Director CTRU - Design, Trials and Statistics (DTS). Research Fellow - The NIHR Research Design Service for Yorkshire & the Humber.

School of Health and Related Research (SchARR)

University of Sheffield

Sheffield.

UK

Ms Kate Brian - Patient & Public Involvement (PPI)

Fertility Network Uk

London.

UK

Professor Ying Cheong - Professor of Reproductive Medicine, Honorary Consultant in Reproductive Medicine and Surgery.

Complete Fertility Centre Southampton

University Hospital Southampton NHS Foundation Trust.

Southampton.

UK

Endometrial Scratch protocol paper for the BMJ open. Version 1.3 dated 12/03/2018

For peer review only - <http://bmjopen.bmj.com/site/about/guidelines.xhtml>

1  
2  
3 Dr Susan Laird – Head of the Department of Biosciences and Chemistry  
4 Biomedical Research Centre  
5 Sheffield Hallam University  
6 Sheffield.  
7  
8 UK  
9

10  
11 Dr Lamiya Mohiyiddeen - Consultant Gynaecologist and Subspecialist in Reproductive  
12 Medicine and Surgery  
13 Saint Mary's Hospital - Central Manchester University Hospitals  
14 Manchester.  
15  
16 UK  
17

18  
19 Mr Jonathan Skull – Consultant in Reproductive Medicine  
20 Fertility Unit - Jessop Wing  
21 Sheffield Teaching Hospitals NHS Foundation Trust  
22 Sheffield.  
23  
24 UK  
25

26  
27 Professor Stephen Walters - Trial Statistician  
28 School of Health and Related Research and  
29 NIHR Research Design Service Yorkshire and the Humber  
30 University of Sheffield  
31 Sheffield.  
32  
33 UK  
34

35  
36 Dr Tracey Young - Senior Researcher in Health Economics  
37 Senior Researcher in Health Economics  
38 Health Economics & Design Science  
39 (SchARR)  
40 University of Sheffield  
41 Sheffield.  
42  
43 UK  
44

45  
46 Mr Mostafa Metwally MD FRCOG - Consultant Gynaecologist and Subspecialist in  
47 Reproductive Medicine and Surgery  
48 Fertility Unit - Jessop Wing  
49 Sheffield Teaching Hospitals NHS Foundation Trust  
50 Sheffield.  
51  
52 UK  
53  
54  
55  
56  
57

**Key words:**

Endometrial Scratch

In Vitro Fertilisation

Endometrial Trauma

Assisted Conception

Randomised Controlled Trial

**Abstract****Introduction**

Endometrial Trauma commonly known as Endometrial Scratch (ES) has been shown to improve pregnancy rates in women with a history of repeated implantation failure undergoing In Vitro Fertilisation (IVF), with or without Intracytoplasmic Sperm Injection (ICSI). However, the procedure has not yet been fully explored in women having IVF/ICSI for the first time. This study aims to examine the effect of performing an ES in the mid-luteal phase prior to first time IVF/ICSI cycle on the chances of achieving a clinical pregnancy and live birth. If ES can influence this success rate there would be a significant cost saving to the NHS through decreasing the number of IVF/ICSI cycles necessary to achieve a pregnancy, increase the practice of single embryo transfer (SET) and consequently have a large impact on risks and costs associated with multiple pregnancies.

**Methods & Analysis**

This 30 month, UK, multi-centre, parallel group, RCT includes a 9month internal pilot and health economic analysis recruiting 1044 women from 16 Fertility Units. It will follow up participants to identify if IVF/ICSI has been successful and live birth has occurred up to 6 weeks post-partum. Primary analysis will be on an intention to treat basis. A sub-study of endometrial samples obtained during the ES will assess the role of immune factors in embryo implantation. Main trial recruitment commenced January 2017 and is ongoing.

Participants randomised to the intervention group will receive the ES procedure in the mid luteal phase of the preceding cycle prior to first time IVF/ICSI treatment versus usual IVF/ICSI treatment in the control group, with 1:1 randomisation. The primary outcome is live birth rate (LBR) after completed 24 weeks gestation.

**Ethics and dissemination**

South Central – Berkshire NREC approved the protocol. Findings will be submitted to peer-reviewed journals and abstracts to relevant national and international conferences.

Trial Registration number: ISRCTN: 23800982. Protocol Date: Version 5 Dated 20/07/2017

Endometrial Scratch protocol paper for the BMJ open. Version 1.3 dated 12/03/2018

### Strengths and limitations of this study

- This is the largest multicentre, pragmatic randomised controlled trial to date which aims to assess the effectiveness and cost effectiveness of performing the ES procedure in women having IVF/ICSI for the first time
- It aims to determine whether performing an ES is an acceptable and well tolerated procedure.
- Due to the nature of the intervention it is not possible to blind study participants or clinicians.
- Potential difficulty with recruitment if patients are not in equipoise about effectiveness of the ES procedure in first time IVF/ICSI cycles.

### Background

The use of local endometrial trauma known as Endometrial Scratch (ES) to improve implantation rates in women undergoing assisted conception was first described in 2003 [1]. The procedure has since been explored in several studies mainly focusing on women with recurrent implantation failure and has been shown to significantly increase pregnancy rates by almost double [2–4]. However, uncertainty remains as to the therapeutic effect of ES, due to heterogeneity of the populations included - and the timing and exact protocol of ES used - in previous evaluations [5,6]. Three systematic reviews have summarised the evidence, however each included different studies [2,7,8]. A recent Cochrane review included fourteen randomised studies; seven in women with previous cycle failure, five in an unselected population and one in a first-time cycle [8]. The live birth rate meta-analysis combined trials regardless of the population (i.e. number of previous IVF cycles) and included five studies, reporting a risk ratio (RR) of 1.42 (1.08, 1.85),  $p=0.02$ . The odds of achieving a clinical pregnancy were also increased following ES with a RR of 1.34 (1.11, 1.62),  $p=0.002$ . The one trial conducted in women undergoing their first IVF cycle indicated the procedure was harmful with an OR of clinical pregnancy rate of 0.30 (0.14, 0.63)  $p=0.002$  [9]. Notably, this trial performed the ES procedure at the time of oocyte retrieval and not in the month prior to the IVF cycle. Despite the concerns around the quality of evidence in using ES and that many of the trials undertaken so far have been small (most <150 participants), ES has been widely adopted into routine clinical practice in women with recurrent unsuccessful implantation and is currently being provided in some fertility units where women are having IVF/ICSI for the first time [10,11]. Two large trials are currently in progress to determine if ES is beneficial in women undergoing their 2<sup>nd</sup> IVF cycle [12] and a sample of women undergoing any IVF cycle [13]. Therefore, given the lack of evidence for the effectiveness of ES in women undergoing their 1<sup>st</sup> cycle of IVF/ICSI, it is essential that a large well controlled multi-centre trial is conducted to fully investigate the effectiveness and safety of this technique.

The Human Fertilisation and Embryology Authority (HFEA) state in their statistical report into multiple births that the risks associated with multiple births is the single biggest health risk associated with fertility treatment [14]. Multiple births carry risks to the health of both



1  
2  
3 the mother and the babies and that birth of a healthy singleton child, born at full term, is  
4 therefore the safest outcome of fertility treatment for both mother and child and is best  
5 achieved through promoting the practice of SET.  
6

7  
8 If ES can improve the implantation potential of the embryo and therefore improve success  
9 rates, ES may encourage an expansion of current SET policies. Inclusion of women with a  
10 lower chance of having cryopreserved embryos and a more general increase in the  
11 implementation of the practice of SET, could consequently have a large impact on the risks  
12 and costs associated with multiple pregnancies as a result of IVF [15].  
13

14  
15 The exact mechanism by which ES may improve implantation is not yet known, however it is  
16 known that implantation is a complex process involving a number of inflammatory  
17 mediators including uterine natural killer cells, leukaemia inhibitory factor and interleukin  
18 15 [13]. It is possible that ES may lead to the activation of inflammatory cells such as  
19 macrophages and dendritic cells, and release of inflammatory mediators such as tumour  
20 necrosis factor- $\alpha$ , interleukin-15, growth-regulated oncogene- $\alpha$  and macrophage  
21 inflammatory protein 1B [14].  
22  
23

24  
25 ES has also been shown to cause the modulation of several endometrial genes that may be  
26 involved in membrane stability during the process of implantation such as bladder  
27 transmembranal protein (UPIb) and adipose differentiation-related protein and mucin 1  
28 [16].  
29  
30

31 ES is routinely performed as an outpatient procedure. Risks have been identified in a  
32 previous study when the procedure was undertaken on the day of oocyte retrieval (reduced  
33 implantation and pregnancy rates) [9]; however, the procedure is not known to be  
34 associated with any particular risks when undertaken in the menstrual cycle preceding that  
35 of IVF therapy, apart from period like discomfort whilst performing the procedure. Taking  
36 simple analgesics prior to the procedure usually alleviates this. As with any intrauterine  
37 procedure there is a potential for intrauterine infection. However women attending for  
38 fertility treatment are usually screened for serious vaginal infections such as chlamydia to  
39 minimise the risk of any spread of infection when performing the embryo transfer  
40 procedure, a similar procedure to an ES as it involves the insertion of a catheter into the  
41 uterine cavity.  
42  
43  
44  
45

46 The main objectives of this trial are to assess the clinical and cost effectiveness of the ES  
47 procedure in women aged between 18 and 37 years (inclusive) undergoing their first  
48 IVF/ICSI cycle using either antagonist or long protocols to see if it could potentially improve  
49 implantation rates and hence encourage the practice of single embryo replacement. A sub-  
50 study will be undertaken in two of the fertility units where endometrial samples obtained  
51 from the ES procedure will be stored for later analysis to identify endometrial factors  
52 associated with successful pregnancy outcome.  
53  
54  
55  
56  
57

### Method and Analysis

The Endometrial Scratch Trial is a multi-centre, parallel group, randomised controlled trial to examine the clinical, cost effectiveness and safety of an ES performed in the mid-luteal phase of the preceding cycle prior to a first time IVF/ICSI cycle. Eligible participants will be randomised to either the treatment as usual (TAU) arm, consisting of usual IVF treatment, or the intervention arm where ES will be performed followed by usual IVF treatment. The overall study design is illustrated below in the study flow chart (figure 1).

### Patient and Public Involvement

The study was reviewed by couples waiting to commence IVF treatment and then by the members of The Jessop Wing Reproductive Health Public Advisory Panel (PPI) at the Jessop Wing-Sheffield. All were asked to provide input into the lay summary, recruitment strategy, visit schedule and benefits of the proposed study to the patient & the NHS. We asked about their experience of assisted conception, the things they liked and disliked, and the potential difficulties or barriers to attending for treatment, randomisation to the TAU arm and how this might affect recruitment but clarified that if the trial showed an increase in the scratch arm assisting embryo implantation, then it would form part of the routine care pathway in the future. A member of the panel agreed to become the Service User Representative, is a member of the Steering committee and attended the Trial Investigator/set-up meeting providing a patients view of all aspects associated with IVF. All PPI members have provided input into the patient facing documents on an ongoing basis and prior to submission to ethics and are aware of recruitment and the conduct of the study at ongoing PPI events held on a bimonthly basis within the Directorate.

The most significant changes to the HTA grant influenced by the PPI members were in relation to trial follow-up procedures as they felt only women who achieved a pregnancy should be followed up. They also wanted to ensure continuity across the participating centres when performing the follow-up visits and requested a proforma be designed to ensure all research nurses/midwives capture the same information.

Upon completion of the trial the results will be summarised in plain English and distributed to participants and patient support groups such as Infertility Network UK with the assistance of our service-user collaborators. We will promote the transfer of knowledge to wider audiences including the general public (e.g. including short, user-friendly articles/briefings in relevant newsletters, magazines and periodicals, user groups/forums).

### **Figure 1. Study flow chart.**

The trial consists of two phases - an internal pilot to assess feasibility of recruitment and delivery of the intervention, and a two year main recruitment phase.

1  
2  
3 The trial will commence with a 9 month internal pilot recruitment phase across  
4 approximately 6 UK fertility units to justify whether or not the recruitment strategy and the  
5 scheduling of the endometrial scratch procedure are feasible and will use the same trial  
6 procedures as described for the main trial.  
7

8  
9 The trial is collaboration between research staff at The Jessop Wing, Sheffield Teaching  
10 Hospital NHS Foundation Trust & The University of Sheffield - Clinical Trials Research Unit  
11 (CTRU) who is responsible for the conduct of the trial. Funding to run the trial has been  
12 awarded by the National Institute of Healthy Research (NIHR) Health Technology  
13 Assessment (HTA). At the end of the pilot phase, the Trial Steering Committee (TSC) will  
14 report to the funder on whether the feasibility criteria have been met and whether the trial  
15 should continue.  
16

17  
18 The trial will be conducted in compliance with the approved protocol, GCP and regulatory  
19 requirements. Main trial recruitment commenced January 2017 and is ongoing.  
20  
21

22 Sheffield CTRU will aggregate feasibility of the research and intervention protocols based on  
23 the following outcomes.  
24

25 The trial will be considered infeasible and will be stopped if either of the following  
26 conditions apply:  
27

28 1. Feasibility of recruitment to the main trial: defined as recruitment of fewer than 108  
29 participants (75% of the 144 target) during the internal pilot phase.  
30

31 2. Scheduling of the ES procedure: defined as less than 75% of women scheduled to receive  
32 their ES procedure have received the ES at the correct time point.  
33  
34

### 35 **Recruitment**

36 Upon successful completion of the pilot the main trial will aim to recruit women from 16 UK  
37 Fertility Units requiring first time IVF treatment. Participation is entirely voluntary and  
38 choosing not to participate will not negatively influence the woman's treatment in any way.  
39 Furthermore consent can be withdrawn at any stage. Women who are about to undergo  
40 their first cycle of IVF/ICSI will be identified by screening patients referred for these  
41 treatments. Eligible women will be sent information regarding the trial in the post or via  
42 e-mail or may be alerted to the trial via the trial website or posters displayed at the fertility  
43 unit. If they are interested in participating they will be invited to discuss the trial with their  
44 fertility team at their next routine appointment.  
45  
46  
47  
48

49 Prior to randomisation full written informed consent will be obtained by a suitably trained  
50 Doctor or Research Nurse/Midwife at a clinic visit. The participant will complete a study  
51 specific resource use questionnaire prior to randomisation to collect health care usage in  
52 the previous 3 months; baseline data will be collected at this visit and participants will be  
53 randomly allocated to either the intervention or usual care arm of the trial.  
54  
55  
56  
57

Detailed methods of the Endometrial Scratch trial are described in the Endometrial Scratch protocol available on the website – <https://www.sheffield.ac.uk/scratchtrial>

Women will be included and considered suitable if they meet the following eligibility criteria:

#### **Inclusion criteria**

1. Women expected to be aged between 18 and 37 years (inclusive) at time of egg collection.
2. First time IVF with or without ICSI treatment using the antagonist or long protocol only.
3. Expected to receive treatment using fresh embryos.
4. Expected good responders to treatment, with:
  - a. Ovulatory menstrual cycle (Regular menstrual cycles defined by clinical judgement or with ovulatory levels of mid-luteal serum progesterone as defined by local laboratory protocols)
  - b. Normal uterine cavity (assessed by transvaginal sonography at screening and no endometrial abnormalities such as , suspected intrauterine adhesions, uterine septa, submucosal fibroids or intramural fibroids exceeding 4 cm in diameter as assessed by the investigator that would require treatment to facilitate pregnancy).
  - c. Expected good ovarian reserve (assessed clinically, biochemically (FSH< 10 & normal follicular phase oestradiol levels and or normal AMH), and or sonographically (antral follicle counts) and no history of previous radiotherapy or chemotherapy). [All laboratory/ultrasound standards based on local normal reference ranges.]
  - d. Single embryo transfer (SET) expected.
5. Local procedures have been / will be followed to exclude relevant vaginal/uterine infections prior to starting treatment.
6. Willing to use an appropriate method of barrier contraception if randomised to Endometrial Scratch (ES) in the cycle where the ES procedure is performed. .
7. Understands/willing to comply with the protocol.

#### **Exlcusion criteria**

1. Previous trauma/surgery to the endometrium (e.g. resection of submucous fibroid, intrauterine adhesions.).
2. BMI of 35 kg/m<sup>2</sup> or greater.
3. Known grade 4 (severe) endometriosis.
4. Currently participating in any other fertility study involving medical/surgical intervention.
5. Expected to receive protocols other than antagonist or long (e.g. ultra-long protocol).
6. An endometrial scratch (or similar procedure, e.g. endometrial biopsy for the collection of Natural Killer Cells) is planned.
7. Previously randomised into this trial.

### Sampling

The primary outcome is the LBR. This is defined as a live birth after completed 24 weeks gestation, within the 10.5 month post egg collection follow-up period. This time-period will enable the collection of any neonatal deaths (up to 6 weeks post-partum). The denominator for calculating the LBR will be the number of women randomised to each group. Data from the HFEA suggests a live birth rate of 32.8% in women under 35 and 27.3 % in women aged 35-37. The sample size calculation assumes a 30% LBR in the control group and that an absolute increase of 10%, to a 40% LBR (a relative risk of 1.33) in the intervention groups is of clinical and practical importance. The effect size, a 10% absolute difference in LBR, we are proposing is large but we believe an effect of such magnitude is needed to change clinical practice (there is a 5% absolute difference in LBR between women aged under 35 and 35-37) and is less than that observed in the systematic reviews described above (where, at the time of sample size calculation, the relative risk estimates for live birth ranged from 1.83 to 2.46) [2,17]. To have a 90% power of detecting this difference or more, in LBR rates between the groups, as statistically significant at the 5% two-sided level, will require 496 women per group (992 in total). Adjusting for a predicted drop-out rate of 5% (due to anticipated difficulties of follow-up for patients who have been referred from NHS Trusts other than the participating Fertility Unit) we will require 1044 participants.

### Study procedures

Following randomisation women in the intervention arm will have the ES procedure performed in the mid-luteal phase of the preceding cycle prior to their planned IVF/ICSI cycle in the outpatient setting of the fertility unit. The choice of screening for infection prior to the procedure or the administration of antibiotics will be left to individual unit according to their local established protocols and procedures. Women can be randomised any time up until they start their IVF cycle, although it may be necessary for the participant to delay her IVF if randomised to the intervention arm. This decision to delay should be made and agreed by both the patient and her fertility team before randomisation is undertaken. The oral contraceptive pill can be used following randomisation for the purposes of cycle programming but women must be having ovulatory periods at the point of entry into the trial. Women randomised to TAU will continue with their IVF/ICSI as planned and will not receive the ES procedure.

Following delivery of the ES, participants will undergo IVF/ICSI in line with local procedures. Following successful embryo transfer (in both groups) a pregnancy test will be performed and adverse events will be collected. In cases where women do not undergo embryo transfer, every effort will be made by the research team to collect any adverse event information from either the patient or the medical notes. If a pregnancy is confirmed the woman is discharged to normal antenatal care as per standard practice. It is the intention to obtain the pregnancy status of all women once randomised including the outcome of all spontaneous pregnancies, the first frozen embryo transfer if no fresh transfer has been undertaken as well as those that delay treatment following the ES. Women will not be

Endometrial Scratch protocol paper for the BMJ open. Version 1.3 dated 12/03/2018

For peer review only - <http://bmjopen.bmj.com/site/about/guidelines.xhtml>

1  
2  
3 followed-up if they withdraw their consent from the trial. Data will also be collected  
4 regarding participants who have received an ES outside the trial.  
5

### 6 **Randomisation**

7 The randomisation schedule will be generated by Sheffield CTRU prior to the start of the  
8 trial; access to the schedule will be limited only to the trial statistician. The randomisation  
9 sequence will be computer generated and stratified by site and protocol (antagonist or long  
10 protocol). Random permuted blocks of variable size will be used to ensure enough  
11 participants are allocated evenly to each arm of the trial at each site. Research staff at  
12 recruiting centres will be unable to access the randomisation sequence and will use a web  
13 based computer system with restricted access rights to enter participant details;  
14 randomisation outcome will then be revealed. Re-randomisation will not be permitted.  
15  
16  
17  
18

### 19 **Trial Intervention**

20 ES is a minor procedure of 10 to 20 minute duration that will be performed in an outpatient  
21 setting at local IVF centres in line with local procedures and the trial standard operation  
22 procedure (SOP). The participant will be required to use a barrier method of contraception  
23 (if necessary) during the menstrual cycle in which the ES will be performed. During ES, a  
24 speculum is inserted into the vagina and the cervix exposed and cleaned. A pipelle or similar  
25 endometrial sampler is then inserted into the cavity of the uterus; negative pressure is  
26 applied by withdrawal of the plunger. The sampler is rotated and withdrawn several times  
27 so that tissue appears in the transparent tube. The sampler and speculum are then  
28 removed. If no tissue is seen in the transparent sampler, this is an indication that the  
29 sampler was not fully inside the uterine cavity and therefore the procedure is repeated.  
30 Following the procedure women will complete a visual pain scale (likert) to assess their pain  
31 and tolerability assessment of the procedure within 30 minutes of the initial ES and then  
32 again at 24 hours and 7 days post procedure via an automated text message.  
33  
34  
35  
36  
37

38 Compliance to the intervention will be ascertained through the clinician or Research  
39 Nurse/Midwife recording whether or not the patient has a) attended the clinic for the ES  
40 procedure and b) received the ES procedure as per protocol. Any deviation from the  
41 protocol will be noted and reported as per the Sheffield CTRU SOP.  
42  
43

### 44 **Follow-up**

45 Patient follow up will continue until either the 1st cycle of IVF has been completed or the  
46 resulting pregnancy has concluded. If no pregnancy is confirmed the study is complete  
47 (regardless of which group the woman is randomised to). Pregnant women will be followed-  
48 up at 3 and 6 months post egg collection and then 6 weeks post-partum to collect  
49 pregnancy outcome and safety data. If the pregnancy is ongoing at 3 months and 6 week  
50 post-partum, a health resource use questionnaire will be sent to the patient for completion.  
51 If a spontaneous pregnancy is achieved between randomisation and IVF treatment, the  
52 pregnancy will be followed up as described above, instead of egg collection, the date of the  
53  
54  
55  
56  
57

1  
2  
3 last menstrual period (LMP) will be used to schedule the 3/6 month & 6 week post-partum  
4 follow ups.  
5

### 6 **Safety considerations, safety monitoring and AE reporting**

7 All Adverse Events (AEs) and Serious Adverse Events (SAEs) will be recorded by the local  
8 research team at each Fertility Unit. All AEs/SAEs will be followed up until satisfactory  
9 resolution or until the treating Clinician and the Principal Investigator deems the event to be  
10 chronic or the participant to be stable. Research Nurses/Midwives will ask patients for any  
11 details of adverse events at five time-points: post procedure (if randomised to receive ES),  
12 at the participants' pregnancy test, and then, if pregnancy has been achieved, at 3 and 6  
13 months post egg collection and finally 6 weeks post-partum.  
14  
15  
16

17  
18 AEs/SAEs will be collected up to the participants' final study related follow-up event. If  
19 embryo transfer does not occur, the Research Nurse/Midwife will contact the participant  
20 approximately 2 weeks after egg collection to identify if any adverse events have occurred.  
21 In the case of a negative pregnancy test, the site research team should make every effort to  
22 obtain AE data from the patient or the medical notes at routine clinical care contacts; no  
23 further contact will be made outside of routine clinical care.  
24  
25  
26

27 Expected AEs will be those which occur regularly due to pregnancy, and expected SAEs are  
28 those events which are expected in the patient population as a result of the routine  
29 care/treatment of a patient. Expected SAEs and all AEs will be collected as part of the trial  
30 and entered into the eCRF, but will not be reported to regulatory bodies (NHS REC/sponsor).  
31 Unexpected SAEs will be reported to the Sheffield CTRU as soon as staff at the fertility units  
32 become aware of the event.  
33  
34

35 All SAEs will be reviewed by the Data Monitoring & Ethics Committee (DMEC) and Trial  
36 Management Group (TMG) at regular intervals. The Chief Investigator (CI) will inform all  
37 Principal Investigators (PIs) concerned of relevant information that would adversely affect  
38 the safety of the participants.  
39  
40  
41

### 42 **Outcomes**

43 Primary clinical outcome  
44

- 45 • Live birth rate; based on the number of live births after 24 weeks gestation within  
46 the 10.5 month post egg collection follow-up period.  
47

48 Secondary outcomes  
49

- 50 • Acceptability and pain rating of the Endometrial Scratch procedure, a visual pain  
51 scale (likert) to assess their pain and tolerability assessment of the procedure within  
52 30minutes of the initial ES procedure, 1 day later and then again 7 days after the ES.  
53
- 54 • Implantation rate based on a positive serum Beta hCG on approximately day 14  
55 following the egg collection or by a positive urine pregnancy test.  
56  
57

58 Endometrial Scratch protocol paper for the BMJ open. Version 1.3 dated 12/03/2018

- Clinical pregnancy rate; an observation of viable intrauterine pregnancy with a positive heart pulsation seen on ultrasound at/after 8 weeks gestation
- Miscarriage rate as measured by spontaneous pregnancy loss (including pregnancy of unknown location (PUL) prior to 24 weeks gestation within the 10.5 month post egg collection follow-up period
- Ectopic pregnancy as measured by the rate of pregnancy outside the normal uterine cavity
- Multiple birth rate, defined as the birth of more than one living foetus after completed 24 weeks gestation
- Preterm delivery rate as measured by live birth after 24 weeks before 37 weeks gestation within the 10.5 month post egg collection follow-up period.
- Still birth rate based on the delivery of a still born foetus showing no signs of life after 24 weeks gestation within the 10.5 month post egg collection follow-up period.
- Details of participant's IVF cycles including number of eggs retrieved, number of embryos generated 1 day after egg collection, quality of the embryos transferred (using NEQAS grading) and the number of embryos replaced and day of embryo replacement.
- Adverse events
- Health resource use of the participant & patient costs

The trial includes a health economic component to assess the cost of the intervention per extra live birth from an NHS and social care perspective. Resource use will include the intervention costs for ES, the cost of IVF treatment, visits to the Assisted Conception Unit and for those who conceive antenatal and post-natal visits, delivery costs and any hospital stays not related to birth for both mother and baby. The resource use questionnaire will collect information on contacts with midwife and GP visits. A Patient Cost questionnaire will collect time taken to travel to appointments and loss of productivity. Unit costs will be derived from appropriate national sources and will include; NHS reference costs, Personal Social Service Research Unit costs and the **Office of National Statistics** [18–20]. The resource use questionnaire will be designed for this study and will draw on data collection tools developed in The School of Health and Related Research (SchARR) and those collated by the Database for Instruments for Resource Use Measurement (DIRUM).

### **Blinding**

Since this trial evaluates objectively measured outcomes (pregnancy rates) that are unlikely to be affected by a placebo effect, participants will not be blinded to treatment allocation; it is therefore not necessary to perform a sham procedure for the control group. The study statistician, TSC and health economist will be blinded to the allocation.

### **Trial monitoring and oversight committees**

The trial will be overseen by the TSC and the DMEC, membership of both will consist of independent experts in the field. The TSC will include a patient representative. Both



committees will review recruitment, study progress and adverse events. The DMEC will receive monthly reports of recruitment and adverse events and, at their meetings, will also consider emerging evidence from other trials or research on ES. They may advise the chair of the TSC at any time if, in their view, the trial should be stopped for ethical reasons, including concerns about patient safety.

Day-to-day running of the trial will be coordinated by the Trial Management Group (TMG), consisting of the grant co-applicants, plus members of the Jessop Wing Fertility Unit, Sheffield CTRU and Patient representatives.

### **Statistical analysis**

Primary analysis will be performed on the intention to treat population (all participants randomised into the trial). All statistical exploratory tests will be two-tailed at 5% nominal level. Baseline demographic (e.g. age), physical measurements (e.g. BMI), and health-related data will be described and summarised overall and for both treatment groups. The women, not the IVF cycle will be the unit of analysis. If the woman fails to get pregnant or does not have IVF treatment, they will be included in the analysis of the primary outcome as a negative outcome (i.e. non-live birth). For sensitivity analyses, per protocol (PP) analyses will also be undertaken which will be defined as for Endometrial Scratch participants in the intervention group, receiving the ES procedure as documented in the study protocol and undergoing IVF/ICSI in the subsequent menstrual cycle, including embryo transfer. For the control group, the PP population will receive IVF/ICSI including embryo transfer. Sub-group analyses will be undertaken to explore the effect of important variables related to the participant and their treatment on the primary and secondary outcomes. These subgroups are:

- Day of embryo transfer (day 2, 3, 4, 5 or 6),
- Fertilisation method (IVF, IVF or ICSI, ICSI [spilt]),
- Type of protocol (long or antagonistic),
- Embryo transfer (single or double) and whether the embryo was fresh or frozen
- Previous history of consecutive miscarriages (0-2 vs  $\geq 3$ )

AEs will be reported as a proportion of all women randomised. Adverse events including serious adverse events will be compared between the two groups using a Fisher's Exact test, Chi-squared test or negative binomial regression model in case of repeated events per woman (as appropriate). A 95% CI for the difference in adverse event rate between the groups will also be calculated with associated point estimate depending on the method used.

Health economic results will be presented in the net-benefit framework and will allow for uncertainty using bootstrapping and probabilistic sensitivity analysis.

Endometrial Scratch protocol paper for the BMJ open. Version 1.3 dated 12/03/2018

### **Ethics and dissemination**

The study is registered on the ISRCTN database (reference 23800982) and has been approved by the South Berkshire Research Ethics Committee (reference 16/SC/0151). The findings of this trial will be submitted to peer-reviewed journals and abstracts to national and international conferences. Other stakeholder specific outputs in relevant formats will also be produced for commissioners, IVF practitioners, third sector and user advocacy organisations. A website will be established to promote the work of the trial. All knowledge transfer activity including translation will be informed by input from trial collaborators, the TSC and TMG to ensure the study is meeting the needs of the commissioners and audience.

### **Discussion**

This trial will determine whether performing an ES procedure prior to 1st time IVF/ICSI treatment is an inexpensive, safe and well tolerated procedure that increases the live birth rate in women having SET. If shown to be the case, this will have a significant improvement in first cycle IVF success rates and potentially lead to significant cost savings to the NHS as fewer women would need to have repeat treatment cycles. This is particularly important in the current economic climate and with restrictions on funding and service provision. This will also have a significant impact for women, for whom the burden of repeated cycles is large.

### **Acknowledgements**

We thank Dr Munya Dimairo - Research Fellow in Medical Statistics at the University of Sheffield for his contribution to the design/content of the protocol, The Jessop Wing Reproductive Health Public Advisory Panel as well as each local PI, Research Nurse/Midwife and research delivery team in the recruitment and management of patients.

### **Authors Contributions**

Contributors: MM, CP, JC, KB, YC, SL, LM, JS, SW & TY conceived the study, and contributed to study design, sample size calculations and analytical plans.  
MM, CP, RC, JC, KB, YC, SL, LM, JS, SW & TY initiated the project, have assisted in developing the protocol and helped with implementation.  
CP, RC, JC, & MM drafted the manuscript. All authors read and approved the final manuscript.

### **Competing interests**

None declared.

### **Funding statement**

This trial was funded by the NIHR Health Technology Assessment program grant number [14/08/45]

This article presents independent research supported by the National Institute for Health Research (NIHR). The views expressed are those of the author(s) and not necessarily those of the NHS, the NIHR or the Department of Health

## References

- 1 Barash A, Dekel N, Fieldust S, *et al.* Local injury to the endometrium doubles the incidence of successful pregnancies in patients undergoing in vitro fertilization. *Fertil Steril* 2003;**79**:1317–22. doi:10.1016/S0015-0282(03)00345-5
- 2 El-Toukhy T, Sunkara S, Khalaf Y. Local endometrial injury and IVF outcome: A systematic review and meta-analysis. *Reprod Biomed Online* 2012;**25**:345–54. doi:10.1016/j.rbmo.2012.06.012
- 3 Raziel A, Schachter M, Strassburger D, *et al.* Favorable influence of local injury to the endometrium in intracytoplasmic sperm injection patients with high-order implantation failure. *Fertil Steril* 2007;**87**:198–201. doi:10.1016/j.fertnstert.2006.05.062
- 4 Huang SY, Wang C-J, Soong Y-K, *et al.* Site-specific endometrial injury improves implantation and pregnancy in patients with repeated implantation failures. *Reprod Biol Endocrinol* 2011;**9**:140. doi:10.1186/1477-7827-9-140
- 5 Simón C, Bellver J. Scratching beneath ‘the Scratching Case’: Systematic reviews and metaanalyses, the back door for evidencebased medicine. *Hum. Reprod.* 2014;**29**:1618–21. doi:10.1093/humrep/deu126
- 6 Santamaria X, Katzorke N, Simón C. Endometrial ‘scratching’: What the data show. *Curr. Opin. Obstet. Gynecol.* 2016;**28**:242–9. doi:10.1097/GCO.0000000000000279
- 7 Potdar N, Gelbaya T, Nardo LG. Endometrial injury to overcome recurrent embryo implantation failure: a systematic review and meta-analysis. *Reprod Biomed Online* 2012;**25**:561–71. doi:10.1016/j.rbmo.2012.08.005
- 8 Nastri CO, Lensen SF, Gibreel A, *et al.* Endometrial injury in women undergoing assisted reproductive techniques. *Cochrane database Syst Rev* 2015;**3**:CD009517. doi:10.1002/14651858.CD009517.pub3
- 9 Karimzade MA, Oskouian H, Ahmadi S, *et al.* Local injury to the endometrium on the day of oocyte retrieval has a negative impact on implantation in assisted reproductive cycles: A randomized controlled trial. *Arch Gynecol Obstet* 2010;**281**:499–503. doi:10.1007/s00404-009-1166-1
- 10 Spencer EA, Mahtani KR, Goldacre B, *et al.* Claims for fertility interventions: a systematic assessment of statements on UK fertility centre websites. *BMJ Open* 2016;**6**:e013940. doi:10.1136/bmjopen-2016-013940
- 11 Lensen S, Sadler L, Farquhar C. Endometrial scratching for subfertility: Everyone’s doing it. *Hum Reprod* 2016;**31**:1241–4. doi:10.1093/humrep/dew053

Endometrial Scratch protocol paper for the BMJ open. Version 1.3 dated 12/03/2018

For peer review only - <http://bmjopen.bmj.com/site/about/guidelines.xhtml>

- 1  
2  
3 12 van Hoogenhuijze NE, Torrance HL, Mol F, *et al.* Endometrial scratching in women  
4 with implantation failure after a first IVF/ICSI cycle; does it lead to a higher live birth  
5 rate? The SCRATCH study: A randomized controlled trial (NTR 5342). *BMC Womens*  
6 *Health* 2017;**17**. doi:10.1186/s12905-017-0378-y  
7
- 8 13 Lensen S, Martins W, Nastri C, *et al.* Pipelle for Pregnancy (PIP): study protocols for  
9 three randomised controlled trials. *Trials* 2016;**17**:216. doi:10.1186/s13063-016-  
10 1301-9  
11
- 12 14 Human Fertilisation & Embryology Authority. Improving outcomes for fertility  
13 patients: Multiple births. A statistical report. 2011.  
14
- 15 15 Ledger WL, Anumba D, Marlow N, *et al.* The costs to the NHS of multiple births after  
16 IVF treatment in the UK. *BJOG* 2006;**113**:21–5. doi:10.1111/j.1471-0528.2005.00790.x  
17
- 18 16 Kalma Y, Granot I, Gnainsky Y, *et al.* Endometrial biopsy-induced gene modulation:  
19 first evidence for the expression of bladder-transmembranal uroplakin Ib in human  
20 endometrium. *Fertil Steril* 2009;**91**:1042–9, 1049-9.  
21 doi:10.1016/j.fertnstert.2008.01.043  
22
- 23 17 Nastri CO, Gibreel A, Raine-Fenning N, *et al.* Endometrial injury in women undergoing  
24 assisted reproductive techniques. *Cochrane database Syst Rev* 2012;**7**:CD009517.  
25 doi:10.1002/14651858.CD009517.pub2  
26
- 27 18 NHS reference costs 2012/13. 2013.  
28
- 29 19 Curtis L. Unit costs of health and social care 2013. 2013.  
30
- 31 20 Annual survey for hours and earnings (ASHE). 2012.  
32 [http://www.ons.gov.uk/ons/rel/ashe/annual-survey-of-hours-and-earnings/2012-](http://www.ons.gov.uk/ons/rel/ashe/annual-survey-of-hours-and-earnings/2012-revised-results/index.html)  
33 [revised-results/index.html](http://www.ons.gov.uk/ons/rel/ashe/annual-survey-of-hours-and-earnings/2012-revised-results/index.html) (accessed 12 Sep 2014).  
34  
35  
36  
37  
38  
39  
40  
41  
42  
43  
44  
45  
46  
47  
48  
49  
50  
51  
52  
53  
54  
55  
56  
57

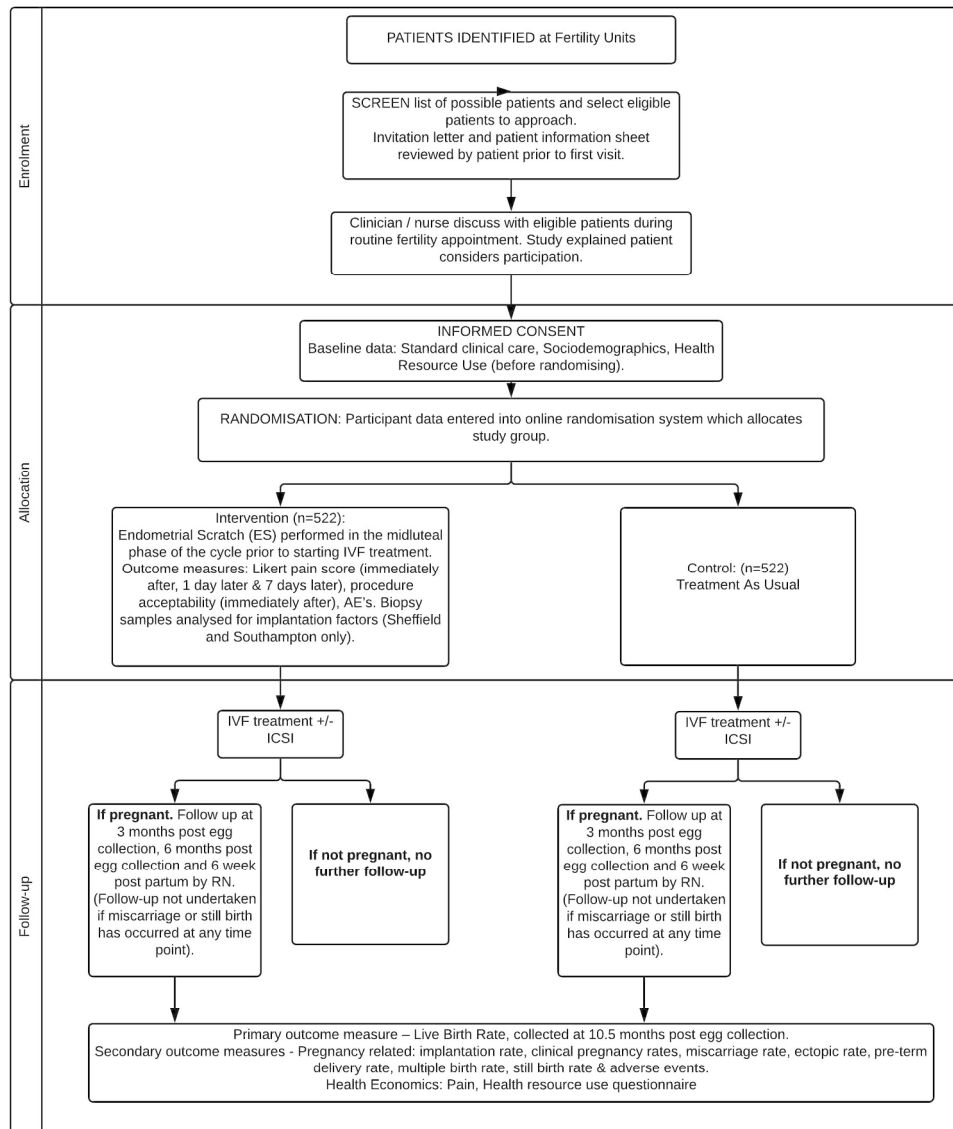

203x241mm (300 x 300 DPI)

# BMJ Open

## Induced Endometrial Trauma (endometrial scratch) in the mid-luteal menstrual cycle phase preceding first cycle IVF/ICSI versus usual IVF/ICSI therapy: Study protocol for a randomised controlled trial.

|                                 |                                                                                                                                                                                                                                                                                                                                                                                                                                                                                                                                                                                                                                                                                                                                                                                                                      |
|---------------------------------|----------------------------------------------------------------------------------------------------------------------------------------------------------------------------------------------------------------------------------------------------------------------------------------------------------------------------------------------------------------------------------------------------------------------------------------------------------------------------------------------------------------------------------------------------------------------------------------------------------------------------------------------------------------------------------------------------------------------------------------------------------------------------------------------------------------------|
| Journal:                        | <i>BMJ Open</i>                                                                                                                                                                                                                                                                                                                                                                                                                                                                                                                                                                                                                                                                                                                                                                                                      |
| Manuscript ID                   | bmjopen-2017-020755.R3                                                                                                                                                                                                                                                                                                                                                                                                                                                                                                                                                                                                                                                                                                                                                                                               |
| Article Type:                   | Protocol                                                                                                                                                                                                                                                                                                                                                                                                                                                                                                                                                                                                                                                                                                                                                                                                             |
| Date Submitted by the Author:   | 29-Mar-2018                                                                                                                                                                                                                                                                                                                                                                                                                                                                                                                                                                                                                                                                                                                                                                                                          |
| Complete List of Authors:       | Pye, Clare; Sheffield Teaching Hospitals NHS Foundation Trust, Obstetrics, Gynaecology & Neonatology<br>Chatters, Robin; University of Sheffield, Health and Related Research<br>Cohen, Judith; The University of Sheffield, School of Health and Related Research (SchARR)<br>Brian, Kate; Fertility UK<br>Cheong, Ying; University of Southampton, Obstetrics and Gynaecology<br>Laird, Susan; Sheffield Hallam University<br>Mohiyiddeen, Lamiya; Central Manchester University Hospitals NHS Foundation Trust, Department Of Reproductive Medicine<br>Skull, Jonathan; Jessop Wing Hospital<br>Walters, Stephen; University of Sheffield, SchARR<br>Young, T; The University of Sheffield, SchARR<br>Metwally, Mostafa; Sheffield Teaching Hospitals NHS Foundation Trust, Obstetrics, Gynaecology & Neonatology |
| <b>Primary Subject Heading</b>: | Reproductive medicine                                                                                                                                                                                                                                                                                                                                                                                                                                                                                                                                                                                                                                                                                                                                                                                                |
| Secondary Subject Heading:      | Obstetrics and gynaecology                                                                                                                                                                                                                                                                                                                                                                                                                                                                                                                                                                                                                                                                                                                                                                                           |
| Keywords:                       | Endometrial Trauma, Endometrial Scratch, IVF, Assisted Conception                                                                                                                                                                                                                                                                                                                                                                                                                                                                                                                                                                                                                                                                                                                                                    |
|                                 |                                                                                                                                                                                                                                                                                                                                                                                                                                                                                                                                                                                                                                                                                                                                                                                                                      |

SCHOLARONE™  
Manuscripts

**Title**

Induced Endometrial Trauma (endometrial scratch) in the mid-luteal menstrual cycle phase preceding first cycle IVF/ICSI versus usual IVF/ICSI therapy: Study protocol for a randomised controlled trial.

**Author (and corresponding author):**

Clare Pye- RN

Lead Research Nurse/Clinical Trial Co-ordinator – Endometrial Scratch Trial

Rm 32, level 4. Jessop Wing

Sheffield Teaching hospitals NHS Foundation Trust

Tree Root Walk,

Sheffield. S10 2SF

Tel: 0114 2268194

E-mail: clare.pye@sth.nhs.uk

**Co-Authors**

Robin Chatters- Trial Manager

University of Sheffield- Clinical Trials Research Unit

Sheffield-UK

Dr Judith Cohen - Research Fellow/ Assistant Director CTRU - Design, Trials and Statistics (DTS). Research Fellow - The NIHR Research Design Service for Yorkshire & the Humber.

School of Health and Related Research (SchARR)

University of Sheffield

Sheffield.

UK

Ms Kate Brian - Patient & Public Involvement (PPI)

Fertility Network UK

London.

UK

Professor Ying Cheong - Professor of Reproductive Medicine, Honorary Consultant in Reproductive Medicine and Surgery.

Complete Fertility Centre Southampton

University Hospital Southampton NHS Foundation Trust.

Southampton.

UK

Endometrial Scratch protocol paper for the BMJ open. Version 1.3 dated 12/03/2018

For peer review only - <http://bmjopen.bmj.com/site/about/guidelines.xhtml>

1  
2  
3 Dr Susan Laird – Head of the Department of Biosciences and Chemistry  
4 Biomedical Research Centre  
5 Sheffield Hallam University  
6 Sheffield.  
7  
8 UK  
9

10  
11 Dr Lamiya Mohiyiddeen - Consultant Gynaecologist and Subspecialist in Reproductive  
12 Medicine and Surgery  
13 Saint Mary's Hospital - Central Manchester University Hospitals  
14 Manchester.  
15  
16 UK  
17

18  
19 Mr Jonathan Skull – Consultant in Reproductive Medicine  
20 Fertility Unit - Jessop Wing  
21 Sheffield Teaching Hospitals NHS Foundation Trust  
22 Sheffield.  
23  
24 UK  
25

26  
27 Professor Stephen Walters - Trial Statistician  
28 School of Health and Related Research and  
29 NIHR Research Design Service Yorkshire and the Humber  
30 University of Sheffield  
31 Sheffield.  
32  
33 UK  
34

35  
36 Dr Tracey Young - Senior Researcher in Health Economics  
37 Senior Researcher in Health Economics  
38 Health Economics & Design Science  
39 (SchARR)  
40 University of Sheffield  
41 Sheffield.  
42  
43 UK  
44

45  
46 Mr Mostafa Metwally MD FRCOG - Consultant Gynaecologist and Subspecialist in  
47 Reproductive Medicine and Surgery  
48 Fertility Unit - Jessop Wing  
49 Sheffield Teaching Hospitals NHS Foundation Trust  
50 Sheffield.  
51  
52 UK  
53  
54



**Key words:**

Endometrial Scratch

In Vitro Fertilisation

Endometrial Trauma

Assisted Conception

Randomised Controlled Trial

**Abstract****Introduction**

Endometrial Trauma commonly known as Endometrial Scratch (ES) has been shown to improve pregnancy rates in women with a history of repeated implantation failure undergoing In Vitro Fertilisation (IVF), with or without Intracytoplasmic Sperm Injection (ICSI). However, the procedure has not yet been fully explored in women having IVF/ICSI for the first time. This study aims to examine the effect of performing an ES in the mid-luteal phase prior to first time IVF/ICSI cycle on the chances of achieving a clinical pregnancy and live birth. If ES can influence this success rate there would be a significant cost saving to the NHS through decreasing the number of IVF/ICSI cycles necessary to achieve a pregnancy, increase the practice of single embryo transfer (SET) and consequently have a large impact on risks and costs associated with multiple pregnancies.

**Methods & Analysis**

This 30 month, UK, multi-centre, parallel group, RCT includes a 9month internal pilot and health economic analysis recruiting 1044 women from 16 Fertility Units. It will follow up participants to identify if IVF/ICSI has been successful and live birth has occurred up to 6 weeks post-partum. Primary analysis will be on an intention to treat basis. A sub-study of endometrial samples obtained during the ES will assess the role of immune factors in embryo implantation. Main trial recruitment commenced January 2017 and is ongoing.

Participants randomised to the intervention group will receive the ES procedure in the mid luteal phase of the preceding cycle prior to first time IVF/ICSI treatment versus usual IVF/ICSI treatment in the control group, with 1:1 randomisation. The primary outcome is live birth rate (LBR) after completed 24 weeks gestation.

**Ethics and dissemination**

South Central – Berkshire NREC approved the protocol. Findings will be submitted to peer-reviewed journals and abstracts to relevant national and international conferences.

Trial Registration number: ISRCTN: 23800982. Protocol Date: Version 5 Dated 20/07/2017

Endometrial Scratch protocol paper for the BMJ open. Version 1.3 dated 12/03/2018

### Strengths and limitations of this study

- This is the largest multicentre, pragmatic randomised controlled trial to date which aims to assess the effectiveness and cost effectiveness of performing the ES procedure in women having IVF/ICSI for the first time
- It aims to determine whether performing an ES is an acceptable and well tolerated procedure.
- Due to the nature of the intervention it is not possible to blind study participants or clinicians.
- Potential difficulty with recruitment if patients are not in equipoise about effectiveness of the ES procedure in first time IVF/ICSI cycles.

### Background

The use of local endometrial trauma known as Endometrial Scratch (ES) to improve implantation rates in women undergoing assisted conception was first described in 2003 [1]. The procedure has since been explored in several studies mainly focusing on women with recurrent implantation failure and has been shown to significantly increase pregnancy rates by almost double [2–4]. However, uncertainty remains as to the therapeutic effect of ES, due to heterogeneity of the populations included - and the timing and exact protocol of ES used - in previous evaluations [5,6]. Three systematic reviews have summarised the evidence, however each included different studies [2,7,8]. A recent Cochrane review included fourteen randomised studies; seven in women with previous cycle failure, five in an unselected population and one in a first-time cycle [8]. The live birth rate meta-analysis combined trials regardless of the population (i.e. number of previous IVF cycles) and included five studies, reporting a risk ratio (RR) of 1.42 (1.08, 1.85),  $p=0.02$ . The odds of achieving a clinical pregnancy were also increased following ES with a RR of 1.34 (1.11, 1.62),  $p=0.002$ . The one trial conducted in women undergoing their first IVF cycle indicated the procedure was harmful with an OR of clinical pregnancy rate of 0.30 (0.14, 0.63)  $p=0.002$  [9]. Notably, this trial performed the ES procedure at the time of oocyte retrieval and not in the month prior to the IVF cycle. Despite the concerns around the quality of evidence in using ES and that many of the trials undertaken so far have been small (most <150 participants), ES has been widely adopted into routine clinical practice in women with recurrent unsuccessful implantation and is currently being provided in some fertility units where women are having IVF/ICSI for the first time [10,11]. Two large trials are currently in progress to determine if ES is beneficial in women undergoing their 2<sup>nd</sup> IVF cycle [12] and a sample of women undergoing any IVF cycle [13]. Therefore, given the lack of evidence for the effectiveness of ES in women undergoing their 1<sup>st</sup> cycle of IVF/ICSI, it is essential that a large well controlled multi-centre trial is conducted to fully investigate the effectiveness and safety of this technique.

The Human Fertilisation and Embryology Authority (HFEA) state in their statistical report into multiple births that the risks associated with multiple births is the single biggest health risk associated with fertility treatment [14]. Multiple births carry risks to the health of both

1  
2  
3 the mother and the babies and that birth of a healthy singleton child, born at full term, is  
4 therefore the safest outcome of fertility treatment for both mother and child and is best  
5 achieved through promoting the practice of SET.  
6

7  
8 If ES can improve the implantation potential of the embryo and therefore improve success  
9 rates, ES may encourage an expansion of current SET policies. Inclusion of women with a  
10 lower chance of having cryopreserved embryos and a more general increase in the  
11 implementation of the practice of SET, could consequently have a large impact on the risks  
12 and costs associated with multiple pregnancies as a result of IVF [15].  
13

14  
15 The exact mechanism by which ES may improve implantation is not yet known, however it is  
16 known that implantation is a complex process involving a number of inflammatory  
17 mediators including uterine natural killer cells, leukaemia inhibitory factor and interleukin  
18 15 [13]. It is possible that ES may lead to the activation of inflammatory cells such as  
19 macrophages and dendritic cells, and release of inflammatory mediators such as tumour  
20 necrosis factor- $\alpha$ , interleukin-15, growth-regulated oncogene- $\alpha$  and macrophage  
21 inflammatory protein 1B [14].  
22  
23

24  
25 ES has also been shown to cause the modulation of several endometrial genes that may be  
26 involved in membrane stability during the process of implantation such as bladder  
27 transmembranal protein (UPIb) and adipose differentiation-related protein and mucin 1  
28 [16].  
29  
30

31 ES is routinely performed as an outpatient procedure. Risks have been identified in a  
32 previous study when the procedure was undertaken on the day of oocyte retrieval (reduced  
33 implantation and pregnancy rates) [9]; however, the procedure is not known to be  
34 associated with any particular risks when undertaken in the menstrual cycle preceding that  
35 of IVF therapy, apart from period like discomfort whilst performing the procedure. Taking  
36 simple analgesics prior to the procedure usually alleviates this. As with any intrauterine  
37 procedure there is a potential for intrauterine infection. However women attending for  
38 fertility treatment are usually screened for serious vaginal infections such as chlamydia to  
39 minimise the risk of any spread of infection when performing the embryo transfer  
40 procedure, a similar procedure to an ES as it involves the insertion of a catheter into the  
41 uterine cavity.  
42  
43  
44  
45

46 The main objectives of this trial are to assess the clinical and cost effectiveness of the ES  
47 procedure in women aged between 18 and 37 years (inclusive) undergoing their first  
48 IVF/ICSI cycle using either antagonist or long protocols to see if it could potentially improve  
49 implantation rates and hence encourage the practice of single embryo replacement. A sub-  
50 study will be undertaken in two of the fertility units where endometrial samples obtained  
51 from the ES procedure will be stored for later analysis to identify endometrial factors  
52 associated with successful pregnancy outcome.  
53  
54  
55  
56  
57

### Method and Analysis

The Endometrial Scratch Trial is a multi-centre, parallel group, randomised controlled trial to examine the clinical, cost effectiveness and safety of an ES performed in the mid-luteal phase of the preceding cycle prior to a first time IVF/ICSI cycle. Eligible participants will be randomised to either the treatment as usual (TAU) arm, consisting of usual IVF treatment, or the intervention arm where ES will be performed followed by usual IVF treatment. The overall study design is illustrated below in the study flow chart (figure 1).

### Patient and Public Involvement

The study was reviewed by couples waiting to commence IVF treatment and then by the members of The Jessop Wing Reproductive Health Public Advisory Panel (PPI) at the Jessop Wing-Sheffield. All were asked to provide input into the lay summary, recruitment strategy, visit schedule and benefits of the proposed study to the patient & the NHS. We asked about their experience of assisted conception, the things they liked and disliked, and the potential difficulties or barriers to attending for treatment, randomisation to the TAU arm and how this might affect recruitment but clarified that if the trial showed an increase in the scratch arm assisting embryo implantation, then it would form part of the routine care pathway in the future. A member of the panel agreed to become the Service User Representative, is a member of the Steering committee and attended the Trial Investigator/set-up meeting providing a patients view of all aspects associated with IVF. All PPI members have provided input into the patient facing documents on an ongoing basis and prior to submission to ethics and are aware of recruitment and the conduct of the study at ongoing PPI events held on a bimonthly basis within the Directorate.

The most significant changes to the HTA grant influenced by the PPI members were in relation to trial follow-up procedures as they felt only women who achieved a pregnancy should be followed up. They also wanted to ensure continuity across the participating centres when performing the follow-up visits and requested a proforma be designed to ensure all research nurses/midwives capture the same information.

Upon completion of the trial the results will be summarised in plain English and distributed to participants and patient support groups such as Infertility Network UK with the assistance of our service-user collaborators. We will promote the transfer of knowledge to wider audiences including the general public (e.g. including short, user-friendly articles/briefings in relevant newsletters, magazines and periodicals, user groups/forums).

### **Figure 1. Study flow chart.**

The trial consists of two phases - an internal pilot to assess feasibility of recruitment and delivery of the intervention, and a two year main recruitment phase.

Endometrial Scratch protocol paper for the BMJ open. Version 1.3 dated 12/03/2018

For peer review only - <http://bmjopen.bmj.com/site/about/guidelines.xhtml>

1  
2  
3 The trial will commence with a 9 month internal pilot recruitment phase across  
4 approximately 6 UK fertility units to justify whether or not the recruitment strategy and the  
5 scheduling of the endometrial scratch procedure are feasible and will use the same trial  
6 procedures as described for the main trial.  
7

8  
9 The trial is collaboration between research staff at The Jessop Wing, Sheffield Teaching  
10 Hospital NHS Foundation Trust & The University of Sheffield - Clinical Trials Research Unit  
11 (CTRU) who is responsible for the conduct of the trial. Funding to run the trial has been  
12 awarded by the National Institute of Healthy Research (NIHR) Health Technology  
13 Assessment (HTA). At the end of the pilot phase, the Trial Steering Committee (TSC) will  
14 report to the funder on whether the feasibility criteria have been met and whether the trial  
15 should continue.  
16

17  
18 The trial will be conducted in compliance with the approved protocol, GCP and regulatory  
19 requirements. Main trial recruitment commenced January 2017 and is ongoing.  
20  
21

22 Sheffield CTRU will aggregate feasibility of the research and intervention protocols based on  
23 the following outcomes.  
24

25 The trial will be considered infeasible and will be stopped if either of the following  
26 conditions apply:  
27

28 1. Feasibility of recruitment to the main trial: defined as recruitment of fewer than 108  
29 participants (75% of the 144 target) during the internal pilot phase.  
30

31 2. Scheduling of the ES procedure: defined as less than 75% of women scheduled to receive  
32 their ES procedure have received the ES at the correct time point.  
33  
34

### 35 **Recruitment**

36 Upon successful completion of the pilot the main trial will aim to recruit women from 16 UK  
37 Fertility Units requiring first time IVF treatment. Participation is entirely voluntary and  
38 choosing not to participate will not negatively influence the woman's treatment in any way.  
39 Furthermore consent can be withdrawn at any stage. Women who are about to undergo  
40 their first cycle of IVF/ICSI will be identified by screening patients referred for these  
41 treatments. Eligible women will be sent information regarding the trial in the post or via  
42 e-mail or may be alerted to the trial via the trial website or posters displayed at the fertility  
43 unit. If they are interested in participating they will be invited to discuss the trial with their  
44 fertility team at their next routine appointment.  
45  
46  
47  
48

49 Prior to randomisation full written informed consent will be obtained by a suitably trained  
50 Doctor or Research Nurse/Midwife at a clinic visit. The participant will complete a study  
51 specific resource use questionnaire prior to randomisation to collect health care usage in  
52 the previous 3 months; baseline data will be collected at this visit and participants will be  
53 randomly allocated to either the intervention or usual care arm of the trial.  
54  
55  
56  
57

58 Endometrial Scratch protocol paper for the BMJ open. Version 1.3 dated 12/03/2018  
59

Detailed methods of the Endometrial Scratch trial are described in the Endometrial Scratch protocol available on the website – <https://www.sheffield.ac.uk/scratchtrial>

Women will be included and considered suitable if they meet the following eligibility criteria:

#### **Inclusion criteria**

1. Women expected to be aged between 18 and 37 years (inclusive) at time of egg collection.
2. First time IVF with or without ICSI treatment using the antagonist or long protocol only.
3. Expected to receive treatment using fresh embryos.
4. Expected good responders to treatment, with:
  - a. Ovulatory menstrual cycle (Regular menstrual cycles defined by clinical judgement or with ovulatory levels of mid-luteal serum progesterone as defined by local laboratory protocols)
  - b. Normal uterine cavity (assessed by transvaginal sonography at screening and no endometrial abnormalities such as , suspected intrauterine adhesions, uterine septa, submucosal fibroids or intramural fibroids exceeding 4 cm in diameter as assessed by the investigator that would require treatment to facilitate pregnancy).
  - c. Expected good ovarian reserve (assessed clinically, biochemically (FSH< 10 & normal follicular phase oestradiol levels and or normal AMH), and or sonographically (antral follicle counts) and no history of previous radiotherapy or chemotherapy). [All laboratory/ultrasound standards based on local normal reference ranges.]
  - d. Single embryo transfer (SET) expected.
5. Local procedures have been / will be followed to exclude relevant vaginal/uterine infections prior to starting treatment.
6. Willing to use an appropriate method of barrier contraception if randomised to Endometrial Scratch (ES) in the cycle where the ES procedure is performed. .
7. Understands/willing to comply with the protocol.

#### **Exlcusion criteria**

1. Previous trauma/surgery to the endometrium (e.g. resection of submucous fibroid, intrauterine adhesions.).
2. BMI of 35 kg/m<sup>2</sup> or greater.
3. Known grade 4 (severe) endometriosis.
4. Currently participating in any other fertility study involving medical/surgical intervention.
5. Expected to receive protocols other than antagonist or long (e.g. ultra-long protocol).
6. An endometrial scratch (or similar procedure, e.g. endometrial biopsy for the collection of Natural Killer Cells) is planned.
7. Previously randomised into this trial.

### Sampling

The primary outcome is the LBR. This is defined as a live birth after completed 24 weeks gestation, within the 10.5 month post egg collection follow-up period. This time-period will enable the collection of any neonatal deaths (up to 6 weeks post-partum). The denominator for calculating the LBR will be the number of women randomised to each group. Data from the HFEA suggests a live birth rate of 32.8% in women under 35 and 27.3 % in women aged 35-37. The sample size calculation assumes a 30% LBR in the control group and that an absolute increase of 10%, to a 40% LBR (a relative risk of 1.33) in the intervention groups is of clinical and practical importance. The effect size, a 10% absolute difference in LBR, we are proposing is large but we believe an effect of such magnitude is needed to change clinical practice (there is a 5% absolute difference in LBR between women aged under 35 and 35-37) and is less than that observed in the systematic reviews described above (where, at the time of sample size calculation, the relative risk estimates for live birth ranged from 1.83 to 2.46) [2,17]. To have a 90% power of detecting this difference or more, in LBR rates between the groups, as statistically significant at the 5% two-sided level, will require 496 women per group (992 in total). Adjusting for a predicted drop-out rate of 5% (due to anticipated difficulties of follow-up for patients who have been referred from NHS Trusts other than the participating Fertility Unit) we will require 1044 participants.

### Study procedures

Following randomisation women in the intervention arm will have the ES procedure performed in the mid-luteal phase of the preceding cycle prior to their planned IVF/ICSI cycle in the outpatient setting of the fertility unit. The choice of screening for infection prior to the procedure or the administration of antibiotics will be left to individual unit according to their local established protocols and procedures. Women can be randomised any time up until they start their IVF cycle, although it may be necessary for the participant to delay her IVF if randomised to the intervention arm. This decision to delay should be made and agreed by both the patient and her fertility team before randomisation is undertaken. The oral contraceptive pill can be used following randomisation for the purposes of cycle programming but women must be having ovulatory periods at the point of entry into the trial. Women randomised to TAU will continue with their IVF/ICSI as planned and will not receive the ES procedure.

Following delivery of the ES, participants will undergo IVF/ICSI in line with local procedures. Following successful embryo transfer (in both groups) a pregnancy test will be performed and adverse events will be collected. In cases where women do not undergo embryo transfer, every effort will be made by the research team to collect any adverse event information from either the patient or the medical notes. If a pregnancy is confirmed the woman is discharged to normal antenatal care as per standard practice. It is the intention to obtain the pregnancy status of all women once randomised including the outcome of all spontaneous pregnancies, the first frozen embryo transfer if no fresh transfer has been undertaken as well as those that delay treatment following the ES. Women will not be

Endometrial Scratch protocol paper for the BMJ open. Version 1.3 dated 12/03/2018

For peer review only - <http://bmjopen.bmj.com/site/about/guidelines.xhtml>

1  
2  
3 followed-up if they withdraw their consent from the trial. Data will also be collected  
4 regarding participants who have received an ES outside the trial.  
5

### 6 **Randomisation**

7 The randomisation schedule will be generated by Sheffield CTRU prior to the start of the  
8 trial; access to the schedule will be limited only to the trial statistician. The randomisation  
9 sequence will be computer generated and stratified by site and protocol (antagonist or long  
10 protocol). Random permuted blocks of variable size will be used to ensure enough  
11 participants are allocated evenly to each arm of the trial at each site. Research staff at  
12 recruiting centres will be unable to access the randomisation sequence and will use a web  
13 based computer system with restricted access rights to enter participant details;  
14 randomisation outcome will then be revealed. Re-randomisation will not be permitted.  
15  
16  
17  
18

### 19 **Trial Intervention**

20 ES is a minor procedure of 10 to 20 minute duration that will be performed in an outpatient  
21 setting at local IVF centres in line with local procedures and the trial standard operation  
22 procedure (SOP). The participant will be required to use a barrier method of contraception  
23 (if necessary) during the menstrual cycle in which the ES will be performed. During ES, a  
24 speculum is inserted into the vagina and the cervix exposed and cleaned. A pipelle or similar  
25 endometrial sampler is then inserted into the cavity of the uterus; negative pressure is  
26 applied by withdrawal of the plunger. The sampler is rotated and withdrawn several times  
27 so that tissue appears in the transparent tube. The sampler and speculum are then  
28 removed. If no tissue is seen in the transparent sampler, this is an indication that the  
29 sampler was not fully inside the uterine cavity and therefore the procedure is repeated.  
30 Following the procedure women will complete a visual pain scale (likert) to assess their pain  
31 and tolerability assessment of the procedure within 30 minutes of the initial ES and then  
32 again at 24 hours and 7 days post procedure via an automated text message.  
33  
34  
35  
36  
37

38 Compliance to the intervention will be ascertained through the clinician or Research  
39 Nurse/Midwife recording whether or not the patient has a) attended the clinic for the ES  
40 procedure and b) received the ES procedure as per protocol. Any deviation from the  
41 protocol will be noted and reported as per the Sheffield CTRU SOP.  
42  
43

### 44 **Follow-up**

45 Patient follow up will continue until either the 1st cycle of IVF has been completed or the  
46 resulting pregnancy has concluded. If no pregnancy is confirmed the study is complete  
47 (regardless of which group the woman is randomised to). Pregnant women will be followed-  
48 up at 3 and 6 months post egg collection and then 6 weeks post-partum to collect  
49 pregnancy outcome and safety data. If the pregnancy is ongoing at 3 months and 6 week  
50 post-partum, a health resource use questionnaire will be sent to the patient for completion.  
51 If a spontaneous pregnancy is achieved between randomisation and IVF treatment, the  
52 pregnancy will be followed up as described above, instead of egg collection, the date of the  
53  
54  
55  
56  
57



1  
2  
3 last menstrual period (LMP) will be used to schedule the 3/6 month & 6 week post-partum  
4 follow ups.  
5

### 6 **Safety considerations, safety monitoring and AE reporting**

7 All Adverse Events (AEs) and Serious Adverse Events (SAEs) will be recorded by the local  
8 research team at each Fertility Unit. All AEs/SAEs will be followed up until satisfactory  
9 resolution or until the treating Clinician and the Principal Investigator deems the event to be  
10 chronic or the participant to be stable. Research Nurses/Midwives will ask patients for any  
11 details of adverse events at five time-points: post procedure (if randomised to receive ES),  
12 at the participants' pregnancy test, and then, if pregnancy has been achieved, at 3 and 6  
13 months post egg collection and finally 6 weeks post-partum.  
14  
15  
16

17  
18 AEs/SAEs will be collected up to the participants' final study related follow-up event. If  
19 embryo transfer does not occur, the Research Nurse/Midwife will contact the participant  
20 approximately 2 weeks after egg collection to identify if any adverse events have occurred.  
21 In the case of a negative pregnancy test, the site research team should make every effort to  
22 obtain AE data from the patient or the medical notes at routine clinical care contacts; no  
23 further contact will be made outside of routine clinical care.  
24  
25  
26

27 Expected AEs will be those which occur regularly due to pregnancy, and expected SAEs are  
28 those events which are expected in the patient population as a result of the routine  
29 care/treatment of a patient. Expected SAEs and all AEs will be collected as part of the trial  
30 and entered into the eCRF, but will not be reported to regulatory bodies (NHS REC/sponsor).  
31 Unexpected SAEs will be reported to the Sheffield CTRU as soon as staff at the fertility units  
32 become aware of the event.  
33  
34

35 All SAEs will be reviewed by the Data Monitoring & Ethics Committee (DMEC) and Trial  
36 Management Group (TMG) at regular intervals. The Chief Investigator (CI) will inform all  
37 Principal Investigators (PIs) concerned of relevant information that would adversely affect  
38 the safety of the participants.  
39  
40  
41

### 42 **Outcomes**

43 Primary clinical outcome  
44

- 45 • Live birth rate; based on the number of live births after 24 weeks gestation within  
46 the 10.5 month post egg collection follow-up period.  
47

48 Secondary outcomes  
49

- 50 • Acceptability and pain rating of the Endometrial Scratch procedure, a visual pain  
51 scale (likert) to assess their pain and tolerability assessment of the procedure within  
52 30minutes of the initial ES procedure, 1 day later and then again 7 days after the ES.  
53
- 54 • Implantation rate based on a positive serum Beta hCG on approximately day 14  
55 following the egg collection or by a positive urine pregnancy test.  
56  
57

58 Endometrial Scratch protocol paper for the BMJ open. Version 1.3 dated 12/03/2018  
59

- Clinical pregnancy rate; an observation of viable intrauterine pregnancy with a positive heart pulsation seen on ultrasound at/after 8 weeks gestation
- Miscarriage rate as measured by spontaneous pregnancy loss (including pregnancy of unknown location (PUL) prior to 24 weeks gestation within the 10.5 month post egg collection follow-up period
- Ectopic pregnancy as measured by the rate of pregnancy outside the normal uterine cavity
- Multiple birth rate, defined as the birth of more than one living foetus after completed 24 weeks gestation
- Preterm delivery rate as measured by live birth after 24 weeks before 37 weeks gestation within the 10.5 month post egg collection follow-up period.
- Still birth rate based on the delivery of a still born foetus showing no signs of life after 24 weeks gestation within the 10.5 month post egg collection follow-up period.
- Details of participant's IVF cycles including number of eggs retrieved, number of embryos generated 1 day after egg collection, quality of the embryos transferred (using NEQAS grading) and the number of embryos replaced and day of embryo replacement.
- Adverse events
- Health resource use of the participant & patient costs

The trial includes a health economic component to assess the cost of the intervention per extra live birth from an NHS and social care perspective. Resource use will include the intervention costs for ES, the cost of IVF treatment, visits to the Assisted Conception Unit and for those who conceive antenatal and post-natal visits, delivery costs and any hospital stays not related to birth for both mother and baby. The resource use questionnaire will collect information on contacts with midwife and GP visits. A Patient Cost questionnaire will collect time taken to travel to appointments and loss of productivity. Unit costs will be derived from appropriate national sources and will include; NHS reference costs, Personal Social Service Research Unit costs and the **Office of National Statistics** [18–20]. The resource use questionnaire will be designed for this study and will draw on data collection tools developed in The School of Health and Related Research (SchARR) and those collated by the Database for Instruments for Resource Use Measurement (DIRUM).

### **Blinding**

Since this trial evaluates objectively measured outcomes (pregnancy rates) that are unlikely to be affected by a placebo effect, participants will not be blinded to treatment allocation; it is therefore not necessary to perform a sham procedure for the control group. The study statistician, TSC and health economist will be blinded to the allocation.

### **Trial monitoring and oversight committees**

The trial will be overseen by the TSC and the DMEC, membership of both will consist of independent experts in the field. The TSC will include a patient representative. Both

1  
2  
3 committees will review recruitment, study progress and adverse events. The DMEC will  
4 receive monthly reports of recruitment and adverse events and, at their meetings, will also  
5 consider emerging evidence from other trials or research on ES. They may advise the chair  
6 of the TSC at any time if, in their view, the trial should be stopped for ethical reasons,  
7 including concerns about patient safety.  
8  
9

10 Day-to-day running of the trial will be coordinated by the Trial Management Group (TMG),  
11 consisting of the grant co-applicants, plus members of the Jessop Wing Fertility Unit,  
12 Sheffield CTRU and Patient representatives.  
13  
14

### 15 **Statistical analysis**

16 Primary analysis will be performed on the intention to treat population (all participants  
17 randomised into the trial). All statistical exploratory tests will be two-tailed at 5% nominal  
18 level. Baseline demographic (e.g. age), physical measurements (e.g. BMI), and health-related  
19 data will be described and summarised overall and for both treatment groups. The women,  
20 not the IVF cycle will be the unit of analysis. If the woman fails to get pregnant or does not  
21 have IVF treatment, they will be included in the analysis of the primary outcome as a  
22 negative outcome (i.e. non-live birth). For sensitivity analyses, per protocol (PP) analyses will  
23 also be undertaken which will be defined as for Endometrial Scratch participants in the  
24 intervention group, receiving the ES procedure as documented in the study protocol and  
25 undergoing IVF/ICSI in the subsequent menstrual cycle, including embryo transfer. For the  
26 control group, the PP population will receive IVF/ICSI including embryo transfer. Sub-group  
27 analyses will be undertaken to explore the effect of important variables related to the  
28 participant and their treatment on the primary and secondary outcomes. These subgroups  
29 are:  
30  
31  
32  
33  
34

- 35 • Day of embryo transfer (day 2, 3, 4, 5 or 6),
  - 36 • Fertilisation method (IVF, IVF or ICSI, ICSI [spilt]),
  - 37 • Type of protocol (long or antagonistic),
  - 38 • Embryo transfer (single or double) and whether the embryo was fresh or frozen
  - 39 • Previous history of consecutive miscarriages (0-2 vs >=3)
- 40  
41  
42  
43  
44  
45

46 AEs will be reported as a proportion of all women randomised. Adverse events including  
47 serious adverse events will be compared between the two groups using a Fisher's Exact test,  
48 Chi-squared test or negative binomial regression model in case of repeated events per  
49 woman (as appropriate). A 95% CI for the difference in adverse event rate between the  
50 groups will also be calculated with associated point estimate depending on the method  
51 used.  
52  
53

54 Health economic results will be presented in the net-benefit framework and will allow for  
55 uncertainty using bootstrapping and probabilistic sensitivity analysis.  
56  
57

58 Endometrial Scratch protocol paper for the BMJ open. Version 1.3 dated 12/03/2018  
59

### **Ethics and dissemination**

The study is registered on the ISRCTN database (reference 23800982) and has been approved by the South Berkshire Research Ethics Committee (reference 16/SC/0151). The findings of this trial will be submitted to peer-reviewed journals and abstracts to national and international conferences. Other stakeholder specific outputs in relevant formats will also be produced for commissioners, IVF practitioners, third sector and user advocacy organisations. A website will be established to promote the work of the trial. All knowledge transfer activity including translation will be informed by input from trial collaborators, the TSC and TMG to ensure the study is meeting the needs of the commissioners and audience.

### **Discussion**

This trial will determine whether performing an ES procedure prior to 1st time IVF/ICSI treatment is an inexpensive, safe and well tolerated procedure that increases the live birth rate in women having SET. If shown to be the case, this will have a significant improvement in first cycle IVF success rates and potentially lead to significant cost savings to the NHS as fewer women would need to have repeat treatment cycles. This is particularly important in the current economic climate and with restrictions on funding and service provision. This will also have a significant impact for women, for whom the burden of repeated cycles is large.

### **Acknowledgements**

We thank Dr Munya Dimairo - Research Fellow in Medical Statistics at the University of Sheffield for his contribution to the design/content of the protocol, The Jessop Wing Reproductive Health Public Advisory Panel as well as each local PI, Research Nurse/Midwife and research delivery team in the recruitment and management of patients.

### **Authors Contributions**

Contributors: MM, CP, JC, KB, YC, SL, LM, JS, SW & TY conceived the study, and contributed to study design, sample size calculations and analytical plans.  
MM, CP, RC, JC, KB, YC, SL, LM, JS, SW & TY initiated the project, have assisted in developing the protocol and helped with implementation.  
CP, RC, JC, & MM drafted the manuscript. All authors read and approved the final manuscript.

### **Competing interests**

None declared.

### **Funding statement**

This trial was funded by the NIHR Health Technology Assessment program grant number [14/08/45]

This article presents independent research supported by the National Institute for Health Research (NIHR). The views expressed are those of the author(s) and not necessarily those of the NHS, the NIHR or the Department of Health

## References

- 1 Barash A, Dekel N, Fieldust S, *et al.* Local injury to the endometrium doubles the incidence of successful pregnancies in patients undergoing in vitro fertilization. *Fertil Steril* 2003;**79**:1317–22. doi:10.1016/S0015-0282(03)00345-5
- 2 El-Toukhy T, Sunkara S, Khalaf Y. Local endometrial injury and IVF outcome: A systematic review and meta-analysis. *Reprod Biomed Online* 2012;**25**:345–54. doi:10.1016/j.rbmo.2012.06.012
- 3 Raziel A, Schachter M, Strassburger D, *et al.* Favorable influence of local injury to the endometrium in intracytoplasmic sperm injection patients with high-order implantation failure. *Fertil Steril* 2007;**87**:198–201. doi:10.1016/j.fertnstert.2006.05.062
- 4 Huang SY, Wang C-J, Soong Y-K, *et al.* Site-specific endometrial injury improves implantation and pregnancy in patients with repeated implantation failures. *Reprod Biol Endocrinol* 2011;**9**:140. doi:10.1186/1477-7827-9-140
- 5 Simón C, Bellver J. Scratching beneath ‘the Scratching Case’: Systematic reviews and metaanalyses, the back door for evidencebased medicine. *Hum. Reprod.* 2014;**29**:1618–21. doi:10.1093/humrep/deu126
- 6 Santamaria X, Katzorke N, Simón C. Endometrial ‘scratching’: What the data show. *Curr. Opin. Obstet. Gynecol.* 2016;**28**:242–9. doi:10.1097/GCO.0000000000000279
- 7 Potdar N, Gelbaya T, Nardo LG. Endometrial injury to overcome recurrent embryo implantation failure: a systematic review and meta-analysis. *Reprod Biomed Online* 2012;**25**:561–71. doi:10.1016/j.rbmo.2012.08.005
- 8 Nastri CO, Lensen SF, Gibreel A, *et al.* Endometrial injury in women undergoing assisted reproductive techniques. *Cochrane database Syst Rev* 2015;**3**:CD009517. doi:10.1002/14651858.CD009517.pub3
- 9 Karimzade MA, Oskouian H, Ahmadi S, *et al.* Local injury to the endometrium on the day of oocyte retrieval has a negative impact on implantation in assisted reproductive cycles: A randomized controlled trial. *Arch Gynecol Obstet* 2010;**281**:499–503. doi:10.1007/s00404-009-1166-1
- 10 Spencer EA, Mahtani KR, Goldacre B, *et al.* Claims for fertility interventions: a systematic assessment of statements on UK fertility centre websites. *BMJ Open* 2016;**6**:e013940. doi:10.1136/bmjopen-2016-013940
- 11 Lensen S, Sadler L, Farquhar C. Endometrial scratching for subfertility: Everyone’s doing it. *Hum Reprod* 2016;**31**:1241–4. doi:10.1093/humrep/dew053

Endometrial Scratch protocol paper for the BMJ open. Version 1.3 dated 12/03/2018

For peer review only - <http://bmjopen.bmj.com/site/about/guidelines.xhtml>

- 1  
2  
3 12 van Hoogenhuijze NE, Torrance HL, Mol F, *et al.* Endometrial scratching in women  
4 with implantation failure after a first IVF/ICSI cycle; does it lead to a higher live birth  
5 rate? The SCRaTCH study: A randomized controlled trial (NTR 5342). *BMC Womens*  
6 *Health* 2017;**17**. doi:10.1186/s12905-017-0378-y  
7
- 8 13 Lensen S, Martins W, Nastri C, *et al.* Pipelle for Pregnancy (PIP): study protocols for  
9 three randomised controlled trials. *Trials* 2016;**17**:216. doi:10.1186/s13063-016-  
10 1301-9  
11
- 12 14 Human Fertilisation & Embryology Authority. Improving outcomes for fertility  
13 patients: Multiple births. A statistical report. 2011.  
14
- 15 15 Ledger WL, Anumba D, Marlow N, *et al.* The costs to the NHS of multiple births after  
16 IVF treatment in the UK. *BJOG* 2006;**113**:21–5. doi:10.1111/j.1471-0528.2005.00790.x  
17
- 18 16 Kalma Y, Granot I, Gnainsky Y, *et al.* Endometrial biopsy-induced gene modulation:  
19 first evidence for the expression of bladder-transmembranal uroplakin Ib in human  
20 endometrium. *Fertil Steril* 2009;**91**:1042–9, 1049-9.  
21 doi:10.1016/j.fertnstert.2008.01.043  
22
- 23 17 Nastri CO, Gibreel A, Raine-Fenning N, *et al.* Endometrial injury in women undergoing  
24 assisted reproductive techniques. *Cochrane database Syst Rev* 2012;**7**:CD009517.  
25 doi:10.1002/14651858.CD009517.pub2  
26
- 27 18 NHS reference costs 2012/13. 2013.  
28
- 29 19 Curtis L. Unit costs of health and social care 2013. 2013.  
30
- 31 20 Annual survey for hours and earnings (ASHE). 2012.  
32 [http://www.ons.gov.uk/ons/rel/ashe/annual-survey-of-hours-and-earnings/2012-](http://www.ons.gov.uk/ons/rel/ashe/annual-survey-of-hours-and-earnings/2012-revised-results/index.html)  
33 [revised-results/index.html](http://www.ons.gov.uk/ons/rel/ashe/annual-survey-of-hours-and-earnings/2012-revised-results/index.html) (accessed 12 Sep 2014).  
34  
35  
36  
37  
38  
39  
40  
41  
42  
43  
44  
45  
46  
47  
48  
49  
50  
51  
52  
53  
54  
55  
56  
57

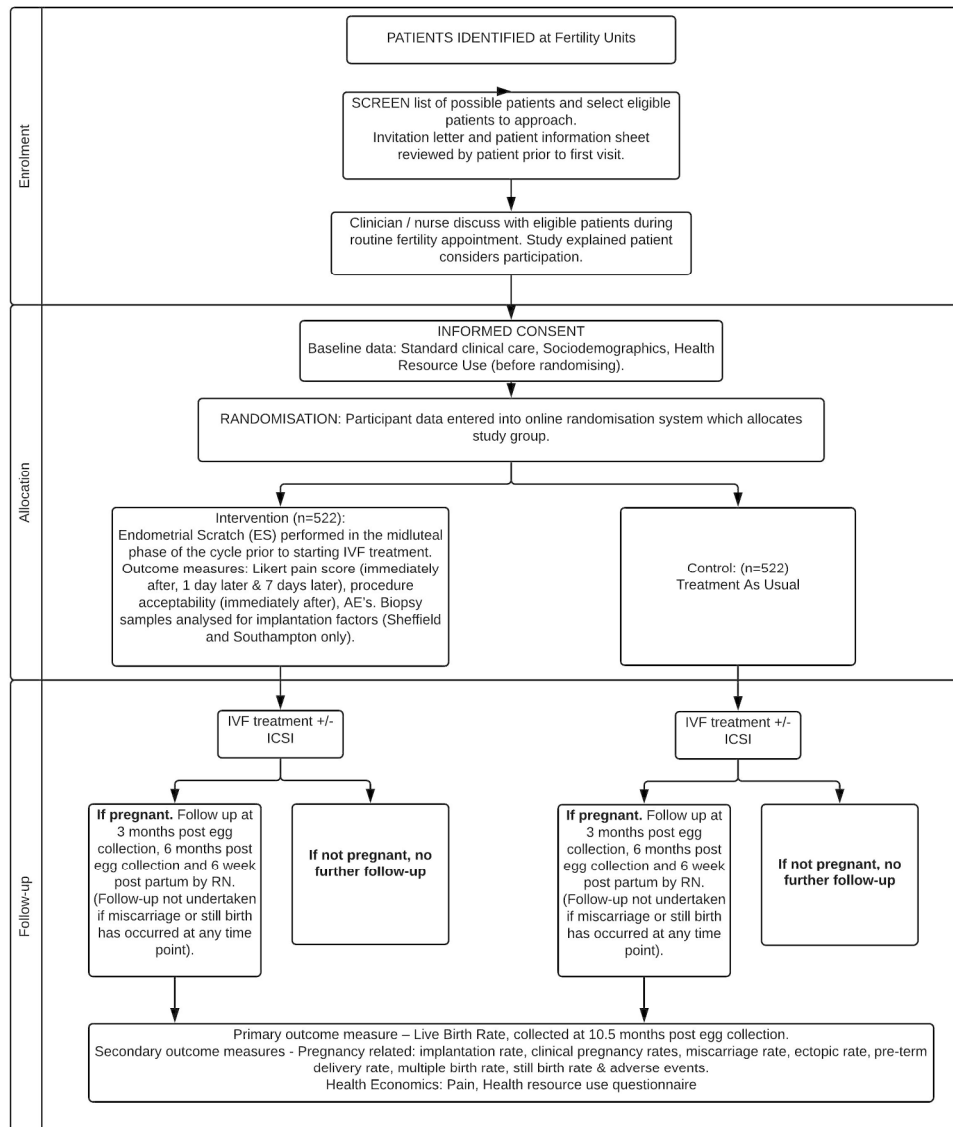

203x241mm (300 x 300 DPI)

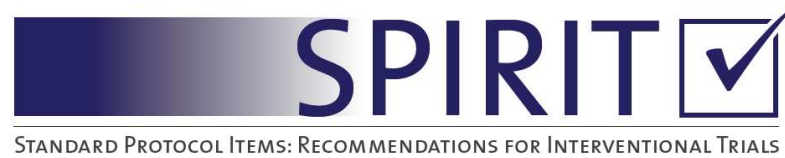

SPIRIT 2013 Checklist: Recommended items to address in a clinical trial protocol and related documents\*

| Section/item                      | Item No | Description                                                                                                  | Addressed on page number                                               |
|-----------------------------------|---------|--------------------------------------------------------------------------------------------------------------|------------------------------------------------------------------------|
| <b>Administrative information</b> |         |                                                                                                              |                                                                        |
| Title                             | 1       | Descriptive title identifying the study design, population, interventions, and, if applicable, trial acronym | Pages 1, 3 & 4 in Manuscript<br>Protocol Version 5<br>Dated 20/07/2017 |
| Trial registration                | 2a      | Trial identifier and registry name. If not yet registered, name of intended registry                         | Page 3 in manuscript<br>Protocol Version 5<br>Dated 20/07/2017         |
|                                   | 2b      | All items from the World Health Organization Trial Registration Data Set                                     | Page 3/4 in Manuscript<br>Protocol Version 5<br>Dated 20/07/2017       |
| Protocol version                  | 3       | Date and version identifier                                                                                  | Page 3 in Manuscript.<br>Protocol Version 5<br>Dated 20/07/2017        |



1  
2  
3  
4  
5  
6  
7  
8  
9  
10  
11  
12  
13  
14  
15  
16  
17  
18  
19  
20  
21  
22  
23  
24  
25  
26  
27  
28  
29  
30  
31  
32  
33  
34  
35  
36  
37  
38  
39  
40  
41  
42  
43  
44  
45  
46  
47

**Funding**

4 Sources and types of financial, material, and other support

Page 7 & 14 in Manuscript Protocol Version 5 Dated 20/07/2017

**Roles and responsibilities**

5a Names, affiliations, and roles of protocol contributors

Page 1, 2 & 14 in Manuscript Protocol Version 5 Dated 20/07/2017

5b Name and contact information for the trial sponsor

Protocol Version 5 Dated 20/07/2017

5c Role of study sponsor and funders, if any, in study design; collection, management, analysis, and interpretation of data; writing of the report; and the decision to submit the report for publication, including whether they will have ultimate authority over any of these activities

Page 14

5d Composition, roles, and responsibilities of the coordinating centre, steering committee, endpoint adjudication committee, data management team, and other individuals or groups overseeing the trial, if applicable (see Item 21a for data monitoring committee)

Pages 7, 12 & 13 in Manuscript. Protocol Version 5 Dated 20/07/2017

**Introduction**

**Background and rationale**

6a Description of research question and justification for undertaking the trial, including summary of relevant studies (published and unpublished) examining benefits and harms for each intervention

Pages 3, 4 & 5 in Manuscript Protocol Version 5 Dated 20/07/2017

6b Explanation for choice of comparators

Page 6 in Manuscript Protocol Version 5 Dated 20/07/2017

|    |                                                           |     |                                                                                                                                                                                                           |                    |
|----|-----------------------------------------------------------|-----|-----------------------------------------------------------------------------------------------------------------------------------------------------------------------------------------------------------|--------------------|
| 1  |                                                           |     |                                                                                                                                                                                                           |                    |
| 2  |                                                           |     |                                                                                                                                                                                                           |                    |
| 3  | Objectives                                                | 7   | Specific objectives or hypotheses                                                                                                                                                                         | Page 3 in          |
| 4  |                                                           |     |                                                                                                                                                                                                           | Manuscript         |
| 5  |                                                           |     |                                                                                                                                                                                                           | Protocol Version 5 |
| 6  |                                                           |     |                                                                                                                                                                                                           | Dated 20/07/2017   |
| 7  |                                                           |     |                                                                                                                                                                                                           |                    |
| 8  | Trial design                                              | 8   | Description of trial design including type of trial (eg, parallel group, crossover, factorial, single group), allocation ratio, and framework (eg, superiority, equivalence, noninferiority, exploratory) | Pages 3, 4, 5 & 6  |
| 9  |                                                           |     |                                                                                                                                                                                                           | in Manuscript      |
| 10 |                                                           |     |                                                                                                                                                                                                           | Protocol Version 5 |
| 11 |                                                           |     |                                                                                                                                                                                                           | Dated 20/07/2017   |
| 12 |                                                           |     |                                                                                                                                                                                                           |                    |
| 13 |                                                           |     |                                                                                                                                                                                                           |                    |
| 14 | <b>Methods: Participants, interventions, and outcomes</b> |     |                                                                                                                                                                                                           |                    |
| 15 |                                                           |     |                                                                                                                                                                                                           |                    |
| 16 | Study setting                                             | 9   | Description of study settings (eg, community clinic, academic hospital) and list of countries where data will be collected. Reference to where list of study sites can be obtained                        | Pages 3 & 7 in     |
| 17 |                                                           |     |                                                                                                                                                                                                           | Manuscript         |
| 18 |                                                           |     |                                                                                                                                                                                                           | Protocol Version 5 |
| 19 |                                                           |     |                                                                                                                                                                                                           | Dated 20/07/2017   |
| 20 |                                                           |     |                                                                                                                                                                                                           |                    |
| 21 | Eligibility criteria                                      | 10  | Inclusion and exclusion criteria for participants. If applicable, eligibility criteria for study centres and individuals who will perform the interventions (eg, surgeons, psychotherapists)              | Page 8 in          |
| 22 |                                                           |     |                                                                                                                                                                                                           | Manuscript         |
| 23 |                                                           |     |                                                                                                                                                                                                           | Protocol Version 5 |
| 24 |                                                           |     |                                                                                                                                                                                                           | Dated 20/07/2017   |
| 25 |                                                           |     |                                                                                                                                                                                                           |                    |
| 26 | Interventions                                             | 11a | Interventions for each group with sufficient detail to allow replication, including how and when they will be administered                                                                                | Page 9 & 10 in     |
| 27 |                                                           |     |                                                                                                                                                                                                           | Manuscript         |
| 28 |                                                           |     |                                                                                                                                                                                                           | Protocol Version 5 |
| 29 |                                                           |     |                                                                                                                                                                                                           | Dated 20/07/2017   |
| 30 |                                                           |     |                                                                                                                                                                                                           |                    |
| 31 |                                                           |     |                                                                                                                                                                                                           |                    |
| 32 |                                                           | 11b | Criteria for discontinuing or modifying allocated interventions for a given trial participant (eg, drug dose change in response to harms, participant request, or improving/worsening disease)            | Page 10 in         |
| 33 |                                                           |     |                                                                                                                                                                                                           | Manuscript         |
| 34 |                                                           |     |                                                                                                                                                                                                           | Protocol Version 5 |
| 35 |                                                           |     |                                                                                                                                                                                                           | Dated 20/07/2017   |
| 36 |                                                           |     |                                                                                                                                                                                                           |                    |
| 37 |                                                           | 11c | Strategies to improve adherence to intervention protocols, and any procedures for monitoring adherence (eg, drug tablet return, laboratory tests)                                                         | Page 10 & 11 in    |
| 38 |                                                           |     |                                                                                                                                                                                                           | Manuscript         |
| 39 |                                                           |     |                                                                                                                                                                                                           | Protocol Version 5 |
| 40 |                                                           |     |                                                                                                                                                                                                           | Dated 20/07/2017   |
| 41 |                                                           |     |                                                                                                                                                                                                           |                    |
| 42 |                                                           |     |                                                                                                                                                                                                           |                    |
| 43 |                                                           |     |                                                                                                                                                                                                           |                    |
| 44 |                                                           |     |                                                                                                                                                                                                           |                    |
| 45 |                                                           |     |                                                                                                                                                                                                           |                    |
| 46 |                                                           |     |                                                                                                                                                                                                           |                    |
| 47 |                                                           |     |                                                                                                                                                                                                           |                    |

1  
2  
3  
4  
5  
6  
7  
8  
9  
10  
11  
12  
13  
14  
15  
16  
17  
18  
19  
20  
21  
22  
23  
24  
25  
26  
27  
28  
29  
30  
31  
32  
33  
34  
35  
36  
37  
38  
39  
40  
41  
42  
43  
44  
45  
46  
47

|                      |     |                                                                                                                                                                                                                                                                                                                                                                                |                                                                   |
|----------------------|-----|--------------------------------------------------------------------------------------------------------------------------------------------------------------------------------------------------------------------------------------------------------------------------------------------------------------------------------------------------------------------------------|-------------------------------------------------------------------|
|                      | 11d | Relevant concomitant care and interventions that are permitted or prohibited during the trial                                                                                                                                                                                                                                                                                  | Page 10 & 11 in Manuscript Protocol Version 5 Dated 20/07/2017    |
| Outcomes             | 12  | Primary, secondary, and other outcomes, including the specific measurement variable (eg, systolic blood pressure), analysis metric (eg, change from baseline, final value, time to event), method of aggregation (eg, median, proportion), and time point for each outcome. Explanation of the clinical relevance of chosen efficacy and harm outcomes is strongly recommended | Page 11 & 12 in Manuscript Protocol Version 5 Dated 20/07/2017    |
| Participant timeline | 13  | Time schedule of enrolment, interventions (including any run-ins and washouts), assessments, and visits for participants. A schematic diagram is highly recommended (see Figure)                                                                                                                                                                                               | Pages 6, 7 & 10 in Manuscript Protocol Version 5 Dated 20/07/2017 |
| Sample size          | 14  | Estimated number of participants needed to achieve study objectives and how it was determined, including clinical and statistical assumptions supporting any sample size calculations                                                                                                                                                                                          | Page 3, 7 & 9 in Manuscript Protocol Version 5 Dated 20/07/2017   |
| Recruitment          | 15  | Strategies for achieving adequate participant enrolment to reach target sample size                                                                                                                                                                                                                                                                                            | Page 7 & 8 in Manuscript Protocol Version 5 Dated 20/07/2017      |

**Methods: Assignment of interventions (for controlled trials)**

Allocation:

|                     |     |                                                                                                                                                                                                                                                                                                                                                          |                                                           |
|---------------------|-----|----------------------------------------------------------------------------------------------------------------------------------------------------------------------------------------------------------------------------------------------------------------------------------------------------------------------------------------------------------|-----------------------------------------------------------|
| Sequence generation | 16a | Method of generating the allocation sequence (eg, computer-generated random numbers), and list of any factors for stratification. To reduce predictability of a random sequence, details of any planned restriction (eg, blocking) should be provided in a separate document that is unavailable to those who enrol participants or assign interventions | Page 10 in Manuscript Protocol Version 5 Dated 20/07/2017 |
|---------------------|-----|----------------------------------------------------------------------------------------------------------------------------------------------------------------------------------------------------------------------------------------------------------------------------------------------------------------------------------------------------------|-----------------------------------------------------------|

|    |                                                           |     |                                                                                                               |                    |
|----|-----------------------------------------------------------|-----|---------------------------------------------------------------------------------------------------------------|--------------------|
| 1  |                                                           |     |                                                                                                               |                    |
| 2  |                                                           |     |                                                                                                               |                    |
| 3  | Allocation                                                | 16b | Mechanism of implementing the allocation sequence (eg, central telephone; sequentially numbered,              | Page 10 in         |
| 4  | concealment                                               |     | opaque, sealed envelopes), describing any steps to conceal the sequence until interventions are assigned      | Manuscript         |
| 5  | mechanism                                                 |     |                                                                                                               | Protocol Version 5 |
| 6  |                                                           |     |                                                                                                               | Dated 20/07/2017   |
| 7  |                                                           |     |                                                                                                               |                    |
| 8  | Implementation                                            | 16c | Who will generate the allocation sequence, who will enrol participants, and who will assign participants to   | Page 10 in         |
| 9  |                                                           |     | interventions                                                                                                 | Manuscript         |
| 10 |                                                           |     |                                                                                                               | Protocol Version 5 |
| 11 |                                                           |     |                                                                                                               | Dated 20/07/2017   |
| 12 |                                                           |     |                                                                                                               |                    |
| 13 | Blinding (masking)                                        | 17a | Who will be blinded after assignment to interventions (eg, trial participants, care providers, outcome        | Page 12 in         |
| 14 |                                                           |     | assessors, data analysts), and how                                                                            | Manuscript         |
| 15 |                                                           |     |                                                                                                               | Protocol Version 5 |
| 16 |                                                           |     |                                                                                                               | Dated 20/07/2017   |
| 17 |                                                           |     |                                                                                                               |                    |
| 18 |                                                           | 17b | If blinded, circumstances under which unblinding is permissible, and procedure for revealing a participant's  | Page 12 in         |
| 19 |                                                           |     | allocated intervention during the trial                                                                       | Manuscript         |
| 20 |                                                           |     |                                                                                                               | Protocol Version 5 |
| 21 |                                                           |     |                                                                                                               | Dated 20/07/2017   |
| 22 |                                                           |     |                                                                                                               |                    |
| 23 |                                                           |     |                                                                                                               |                    |
| 24 |                                                           |     |                                                                                                               |                    |
| 25 | <b>Methods: Data collection, management, and analysis</b> |     |                                                                                                               |                    |
| 26 |                                                           |     |                                                                                                               |                    |
| 27 | Data collection                                           | 18a | Plans for assessment and collection of outcome, baseline, and other trial data, including any related         | Page 10, 11 & 12   |
| 28 | methods                                                   |     | processes to promote data quality (eg, duplicate measurements, training of assessors) and a description of    | of manuscript &    |
| 29 |                                                           |     | study instruments (eg, questionnaires, laboratory tests) along with their reliability and validity, if known. | Protocol V5 dated  |
| 30 |                                                           |     | Reference to where data collection forms can be found, if not in the protocol                                 | 20/07/2017         |
| 31 |                                                           |     |                                                                                                               |                    |
| 32 |                                                           | 18b | Plans to promote participant retention and complete follow-up, including list of any outcome data to be       | Page 10 of         |
| 33 |                                                           |     | collected for participants who discontinue or deviate from intervention protocols                             | manuscript         |
| 34 |                                                           |     |                                                                                                               | Protocol V5 dated  |
| 35 |                                                           |     |                                                                                                               | 20/07/2017         |
| 36 |                                                           |     |                                                                                                               |                    |
| 37 | Data management                                           | 19  | Plans for data entry, coding, security, and storage, including any related processes to promote data quality  | Protocol V5 dated  |
| 38 |                                                           |     | (eg, double data entry; range checks for data values). Reference to where details of data management          | 20/07/2017         |
| 39 |                                                           |     | procedures can be found, if not in the protocol                                                               |                    |
| 40 |                                                           |     |                                                                                                               |                    |
| 41 |                                                           |     |                                                                                                               |                    |
| 42 |                                                           |     |                                                                                                               |                    |
| 43 |                                                           |     |                                                                                                               |                    |
| 44 |                                                           |     |                                                                                                               |                    |
| 45 |                                                           |     |                                                                                                               |                    |
| 46 |                                                           |     |                                                                                                               |                    |
| 47 |                                                           |     |                                                                                                               |                    |

1  
2  
3  
4  
5  
6  
7  
8  
9  
10  
11  
12  
13  
14  
15  
16  
17  
18  
19  
20  
21  
22  
23  
24  
25  
26  
27  
28  
29  
30  
31  
32  
33  
34  
35  
36  
37  
38  
39  
40  
41  
42  
43  
44  
45  
46  
47

|                            |     |                                                                                                                                                                                                                                                                                                                                       |                                                                    |
|----------------------------|-----|---------------------------------------------------------------------------------------------------------------------------------------------------------------------------------------------------------------------------------------------------------------------------------------------------------------------------------------|--------------------------------------------------------------------|
| Statistical methods        | 20a | Statistical methods for analysing primary and secondary outcomes. Reference to where other details of the statistical analysis plan can be found, if not in the protocol                                                                                                                                                              | Pages 13 & 14 of Manuscript and Protocol V5 dated 20/07/2017       |
|                            | 20b | Methods for any additional analyses (eg, subgroup and adjusted analyses)                                                                                                                                                                                                                                                              | Pages 13 & 14 of Manuscript and Protocol V5 dated 20/07/2017       |
|                            | 20c | Definition of analysis population relating to protocol non-adherence (eg, as randomised analysis), and any statistical methods to handle missing data (eg, multiple imputation)                                                                                                                                                       | Protocol V5 dated 20/07/2017                                       |
| <b>Methods: Monitoring</b> |     |                                                                                                                                                                                                                                                                                                                                       |                                                                    |
| Data monitoring            | 21a | Composition of data monitoring committee (DMC); summary of its role and reporting structure; statement of whether it is independent from the sponsor and competing interests; and reference to where further details about its charter can be found, if not in the protocol. Alternatively, an explanation of why a DMC is not needed | Pages 11 & 14 of Manuscript and Protocol V 5 dated 20/07/2017      |
|                            | 21b | Description of any interim analyses and stopping guidelines, including who will have access to these interim results and make the final decision to terminate the trial                                                                                                                                                               | Pages 11, 12 & 13 of Manuscript and Protocol V. 5 dated 20/07/2017 |
| Harms                      | 22  | Plans for collecting, assessing, reporting, and managing solicited and spontaneously reported adverse events and other unintended effects of trial interventions or trial conduct                                                                                                                                                     | Pages 10 & 11. Protocol Version 5 Dated 20/07/2017                 |
| Auditing                   | 23  | Frequency and procedures for auditing trial conduct, if any, and whether the process will be independent from investigators and the sponsor                                                                                                                                                                                           | Pages 12 & 14 in Manuscript & Protocol V. 5 dated 20/07/2017       |

### Ethics and dissemination

|                                                                                                                      |                          |     |                                                                                                                                                                                                                                  |                                                                                                                                              |
|----------------------------------------------------------------------------------------------------------------------|--------------------------|-----|----------------------------------------------------------------------------------------------------------------------------------------------------------------------------------------------------------------------------------|----------------------------------------------------------------------------------------------------------------------------------------------|
| 1<br>2<br>3<br>4<br>5<br>6<br>7<br>8<br>9                                                                            | Research ethics approval | 24  | Plans for seeking research ethics committee/institutional review board (REC/IRB) approval                                                                                                                                        | Page 3 in Manuscript Protocol Version 5 Dated 20/07/2017                                                                                     |
| 10<br>11<br>12<br>13                                                                                                 | Protocol amendments      | 25  | Plans for communicating important protocol modifications (eg, changes to eligibility criteria, outcomes, analyses) to relevant parties (eg, investigators, REC/IRBs, trial participants, trial registries, journals, regulators) | Protocol V. 5 dated 20/07/2017                                                                                                               |
| 14<br>15<br>16<br>17<br>18<br>19                                                                                     | Consent or assent        | 26a | Who will obtain informed consent or assent from potential trial participants or authorised surrogates, and how (see Item 32)                                                                                                     | Page 7 & 8 in Manuscript Protocol Version 5 Dated 20/07/2017                                                                                 |
| 20<br>21<br>22<br>23<br>24                                                                                           |                          | 26b | Additional consent provisions for collection and use of participant data and biological specimens in ancillary studies, if applicable                                                                                            | Page 7 & 8 of manuscript & Protocol V.5 dated 20/07/2017                                                                                     |
| 25<br>26<br>27                                                                                                       | Confidentiality          | 27  | How personal information about potential and enrolled participants will be collected, shared, and maintained in order to protect confidentiality before, during, and after the trial                                             | Protocol V.5 dated 20/07/2017                                                                                                                |
| 28<br>29<br>30<br>31<br>32<br>33<br>34<br>35<br>36<br>37<br>38<br>39<br>40<br>41<br>42<br>43<br>44<br>45<br>46<br>47 | Declaration of interests | 28  | Financial and other competing interests for principal investigators for the overall trial and each study site                                                                                                                    | ICMJE Form for Disclosure of Potential Conflicts of Interest obtained from all involved and filed in main trial file. Non Disclosed to date. |

1  
2  
3  
4  
5  
6  
7  
8  
9  
10  
11  
12  
13  
14  
15  
16  
17  
18  
19  
20  
21  
22  
23  
24  
25  
26  
27  
28  
29  
30  
31  
32  
33  
34  
35  
36  
37  
38  
39  
40  
41  
42  
43  
44  
45  
46  
47

Access to data

29

Statement of who will have access to the final trial dataset, and disclosure of contractual agreements that limit such access for investigators

MODEL AGREEMENT FOR NON-COMMERCIAL RESEARCH IN THE HEALTH SERVICE. Filed in Main trial file for all research sites involved

Ancillary and post-trial care

30

Provisions, if any, for ancillary and post-trial care, and for compensation to those who suffer harm from trial participation

Sheffield Teaching Hospital NHS Foundation Trust Indemnity applies

Dissemination policy

31a

Plans for investigators and sponsor to communicate trial results to participants, healthcare professionals, the public, and other relevant groups (eg, via publication, reporting in results databases, or other data sharing arrangements), including any publication restrictions

Page 14 in Manuscript Protocol Version 5 Dated 20/07/2017

31b

Authorship eligibility guidelines and any intended use of professional writers

MODEL AGREEMENT FOR NON-COMMERCIAL RESEARCH IN THE HEALTH SERVICE. Filed in Main trial file for all research sites involved

31c

Plans, if any, for granting public access to the full protocol, participant-level dataset, and statistical code

Protocol V.5 dated 20/07/2017

1  
2  
3 **Appendices**  
4

|    |                  |    |                                                                                                           |                         |
|----|------------------|----|-----------------------------------------------------------------------------------------------------------|-------------------------|
| 5  | Informed consent | 32 | Model consent form and other related documentation given to participants and authorised surrogates        | Submitted with          |
| 6  | materials        |    |                                                                                                           | Protocol Version 5      |
| 7  |                  |    |                                                                                                           | Dated 20/07/2017        |
| 8  |                  |    |                                                                                                           | & manuscript            |
| 9  |                  |    |                                                                                                           |                         |
| 10 | Biological       | 33 | Plans for collection, laboratory evaluation, and storage of biological specimens for genetic or molecular | Page 5 of               |
| 11 | specimens        |    | analysis in the current trial and for future use in ancillary studies, if applicable                      | manuscript,,            |
| 12 |                  |    |                                                                                                           | Protocol V.5 dated      |
| 13 |                  |    |                                                                                                           | 20/07/2017 &            |
| 14 |                  |    |                                                                                                           | MODEL                   |
| 15 |                  |    |                                                                                                           | AGREEMENT               |
| 16 |                  |    |                                                                                                           | FOR NON-                |
| 17 |                  |    |                                                                                                           | COMMERCIAL              |
| 18 |                  |    |                                                                                                           | RESEARCH                |
| 19 |                  |    |                                                                                                           | IN THE HEALTH           |
| 20 |                  |    |                                                                                                           | SERVICE. Filed in       |
| 21 |                  |    |                                                                                                           | Main trial file for all |
| 22 |                  |    |                                                                                                           | research sites          |
| 23 |                  |    |                                                                                                           | involved                |
| 24 |                  |    |                                                                                                           |                         |
| 25 |                  |    |                                                                                                           |                         |
| 26 |                  |    |                                                                                                           |                         |

27  
28 \*It is strongly recommended that this checklist be read in conjunction with the SPIRIT 2013 Explanation & Elaboration for important clarification on the items.  
29 Amendments to the protocol should be tracked and dated. The SPIRIT checklist is copyrighted by the SPIRIT Group under the Creative Commons  
30 "[Attribution-NonCommercial-NoDerivs 3.0 Unported](https://creativecommons.org/licenses/by-nc-nd/3.0/)" license.  
31  
32  
33  
34  
35  
36  
37  
38  
39  
40  
41  
42  
43  
44
